# Supplementary material for: Application of hindered ether solvents for palladium catalyzed Suzuki–Miyaura, Sonogashira and cascade Sonogashira cross-coupling reactions
Source: Royal Society of Chemistry journal article supplement (doi:10.1039/d3ob00118k), 2023-01-01
Supplement: d3ob00118k1.pdf [file d3ob00118k1.pdf]

## Electronic supporting information

### Application of hindered ether solvents for palladium catalyzed Suzuki-Miyaura, Sonogashira and cascade Sonogashira cross-coupling reactions

Suwiwat Sangon<sup>a</sup>, Nontipa Supanchaiyamat<sup>a</sup>, James Sherwood<sup>b</sup>, Duncan J. Macquarrie<sup>b</sup>, Pakin Noppawan<sup>c</sup>, and Andrew J. Hunt<sup>a,\*</sup>.

<sup>a</sup>Materials Chemistry Research Center, Department of Chemistry and Center of Excellence for Innovation in Chemistry, Faculty of Science, Khon Kaen University, Khon Kaen, 40002, Thailand. \*Corresponding author: [andrew@kku.ac.th](mailto:andrew@kku.ac.th)

<sup>b</sup>Green Chemistry Centre of Excellence, Department of Chemistry, University of York, York, YO10 5DD, UK.

<sup>c</sup>Department of Chemistry, Faculty of Science, Mahasarakham University, Maha Sarakham, 44150, Thailand.

#### Contents

|                                                                                   |    |
|-----------------------------------------------------------------------------------|----|
| Table S1. Solvent properties.....                                                 | 2  |
| Table S2. Yields of Sonogashira reaction using halobenzene performed in TMO.....  | 2  |
| Table S3. Optimization of Sonogashira reaction.....                               | 3  |
| Table S4. Optimization of cascade Sonogashira reaction.....                       | 3  |
| S5. Materials used for green metric calculation .....                             | 4  |
| S6. <sup>1</sup> H and <sup>13</sup> C NMR Spectra of Synthesized Compounds ..... | 6  |
| S7. References .....                                                              | 35 |

**Table S1.** Boiling point (BP), KAT parameters and Hansen solubility parameters of hindered ether solvents and traditional solvents.

| Solvent                 | BP /°C | $\alpha$ | $\beta$ | $\pi^*$ | $\delta_D$ /MPa <sup>1/2</sup> | $\delta_P$ /MPa <sup>1/2</sup> | $\delta_H$ /MPa <sup>1/2</sup> |
|-------------------------|--------|----------|---------|---------|--------------------------------|--------------------------------|--------------------------------|
| TMO <sup>1</sup>        | 112    | 0.00     | 0.77    | 0.35    | 15.4                           | 2.4                            | 2.1                            |
| DEDMO <sup>2</sup>      | 162    | 0.00     | 0.62    | 0.32    | 16.2                           | 3.1                            | 2.2                            |
| Eucalyptol <sup>3</sup> | 172    | 0.00     | 0.61    | 0.36    | 16.6                           | 2.5                            | 2.5                            |
| THF <sup>1</sup>        | 66     | 0.00     | 0.58    | 0.59    | 16.8                           | 5.7                            | 8.0                            |
| Toluene <sup>1</sup>    | 111    | 0.00     | 0.10    | 0.51    | 18.0                           | 1.4                            | 2.0                            |

Key: BP, boiling point;  $\alpha$ , hydrogen bond donating ability;  $\beta$ , hydrogen bond accepting ability;  $\pi^*$ , dipolarity;  $\delta_D$ , Hansen dispersion force solubility parameter;  $\delta_P$ , Hansen polarity solubility parameter;  $\delta_H$ , Hansen hydrogen bonding solubility parameter.

**Table S2.** Yields of Sonogashira reaction using halobenzene performed in TMO.

| Entry | X  | R                 | Compound | Yields <sup>a</sup> |
|-------|----|-------------------|----------|---------------------|
| 1     | Cl | H                 | 6a, 6'a  | 7%                  |
| 2     | Br | 2-OMe             | 6'h      | trace               |
| 3     | Br | 2-NO <sub>2</sub> | 6'i      | trace               |
| 4     | I  | 2-NH <sub>2</sub> | 6'j      | trace               |
| 5     | Br | 4-OMe             | 6b, 6'b  | 78%                 |
| 6     | I  | 4-CH <sub>3</sub> | 6'k      | 73%                 |

**Table S3.** Optimization of Sonogashira reaction using iodobenzene and phenylacetylene.

| Entry | Catalyst (mol%)            | Base                            | Yield <sup>b</sup> |
|-------|----------------------------|---------------------------------|--------------------|
| 1     | Pd(dba) <sub>2</sub> (10%) | Cs <sub>2</sub> CO <sub>3</sub> | 20%                |
| 2     | Pd(OAc) <sub>2</sub> (10%) | Cs <sub>2</sub> CO <sub>3</sub> | 25%                |
| 3     | PdCl <sub>2</sub> (10%)    | Cs <sub>2</sub> CO <sub>3</sub> | 42%                |
| 4     | PdCl <sub>2</sub> (10%)    | Cs <sub>2</sub> CO <sub>3</sub> | 34% <sup>c</sup>   |
| 5     | PdCl <sub>2</sub> (20%)    | Cs <sub>2</sub> CO <sub>3</sub> | 56%                |
| 6     | PdCl <sub>2</sub> (10%)    | KO <i>t</i> -Bu                 | 91%                |
| 7     | PdCl <sub>2</sub> (5%)     | KO <i>t</i> -Bu                 | 98%                |
| 8     | PdCl <sub>2</sub> (2.5%)   | KO <i>t</i> -Bu                 | 99%                |
| 9     | PdCl <sub>2</sub> (1%)     | KO <i>t</i> -Bu                 | 98%                |

<sup>a</sup> Iodobenzene = 1 mmol, Phenylacetylene = 1.5 mmol, base = 2 mmol, PPh<sub>3</sub> = 0.2 mmol, 100°C, 24 h, 3 mL of TMO as a solvent, <sup>b</sup> Isolated yield and <sup>c</sup> 10 h.

**Table S4.** Optimization of cascade Sonogashira reaction using iodobenzene and phenylacetylene.

| Entry | Catalyst (mol%), PPh <sub>3</sub> (mol%)        | Time (h) | Temp. (°C) | Yield <sup>b</sup> |
|-------|-------------------------------------------------|----------|------------|--------------------|
| 1     | PdCl <sub>2</sub> (10%), PPh <sub>3</sub> (20%) | 2        | 100        | 3%                 |

|   |                                                 |    |     |     |
|---|-------------------------------------------------|----|-----|-----|
| 2 | PdCl <sub>2</sub> (10%), PPh <sub>3</sub> (20%) | 5  | 100 | 8%  |
| 3 | PdCl <sub>2</sub> (10%), PPh <sub>3</sub> (20%) | 24 | 100 | 52% |
| 4 | PdCl <sub>2</sub> (10%), PPh <sub>3</sub> (20%) | 24 | 110 | 43% |

<sup>a</sup> 2-Iodophenol = 1 mmol, Phenylacetylene = 1.5 mmol, KO<sup>t</sup>-Bu = 2 mmol, 3 mL of TMO as a solvent.

<sup>b</sup> Isolated yield.

## S5. Materials used for green metric calculation

**Table S5.** Materials used for green metric calculation.<sup>2,4,5</sup>

| Chemicals                                            | Suzuki reaction                                   |        |            |        |        | Sonogashira reaction                              |        |            |        |        |
|------------------------------------------------------|---------------------------------------------------|--------|------------|--------|--------|---------------------------------------------------|--------|------------|--------|--------|
|                                                      | TMO                                               | DEDMO  | Eucalyptol | THF    | Tol    | TMO                                               | DEDMO  | Eucalyptol | THF    | Tol    |
| Solvent                                              | 1.60                                              | 1.67   | 1.85       | 1.77   | 1.73   | 2.41                                              | 2.51   | 2.78       | 2.65   | 2.60   |
| Product                                              | 0.1372                                            | 0.1326 | 0.1326     | 0.1311 | 0.1357 | 0.1622                                            | 0.1444 | 0.1355     | 0.1515 | 0.1426 |
| Iodobenzene                                          | 1.00 mmol x 204.01 g mol <sup>-1</sup> = 0.2040 g |        |            |        |        | 1.00 mmol x 204.01 g mol <sup>-1</sup> = 0.2040 g |        |            |        |        |
| Phenyl boronic acid / Phenyl acetylene               | 1.25 mmol x 121.93 g mol <sup>-1</sup> = 0.1524 g |        |            |        |        | 1.50 mmol x 102.13 g mol <sup>-1</sup> = 0.1532 g |        |            |        |        |
| Pd(dba) <sub>2</sub> / PdCl <sub>2</sub>             | 0.025 mmol x 575 g mol <sup>-1</sup> = 0.0144 g   |        |            |        |        | 0.10 mmol x 177.33 g mol <sup>-1</sup> = 0.0177 g |        |            |        |        |
| PPh <sub>3</sub>                                     | 0.15 mmol x 262.29 g mol <sup>-1</sup> = 0.0393 g |        |            |        |        | 0.20 mmol x 262.29 g mol <sup>-1</sup> = 0.0524 g |        |            |        |        |
| Reaction water                                       | 0.6667 mL x 1 g mL <sup>-1</sup> = 0.6667 g       |        |            |        |        | -                                                 |        |            |        |        |
| K <sub>2</sub> CO <sub>3</sub> / KO <sup>t</sup> -Bu | 2 mmol x 138.21 g mol <sup>-1</sup> = 0.2764 g    |        |            |        |        | 2 mmol x 112.21 g mol <sup>-1</sup> = 0.2244 g    |        |            |        |        |
| H <sub>2</sub> O                                     | 10 mL x 1 g mL <sup>-1</sup> = 10.00 g            |        |            |        |        | 10 mL x 1 g mL <sup>-1</sup> = 10.00 g            |        |            |        |        |
| EtOAc                                                | 30 mL x 0.902 g mL <sup>-1</sup> = 27.06 g        |        |            |        |        | 30 mL x 0.902 g mL <sup>-1</sup> = 27.06 g        |        |            |        |        |
| MgSO <sub>4</sub>                                    | 0.10 g                                            |        |            |        |        | 0.10 g                                            |        |            |        |        |
| Hexane                                               | 50 ml x 0.655 g mL <sup>-1</sup> = 32.75 g        |        |            |        |        | 50 ml x 0.655 g mL <sup>-1</sup> = 32.75 g        |        |            |        |        |
| silica                                               | 10.00 g                                           |        |            |        |        | 10.00 g                                           |        |            |        |        |

total mass in process

Process mass intensity (PMI) =  $\frac{\text{mass of product}}{\text{total mass in process}}$

mass of isolated product

Reaction mass efficiency (RME) =  $\frac{\text{mass of isolated product}}{\text{total mass of reactants}} \times 100$

molecular weight of product

Atom economy (AE) =  $\frac{\text{molecular weight of product}}{\text{total molecular weight of reactants}} \times 100$

RME

Optimum efficiency (OE) =  $\frac{\text{RME}}{\text{AE}} \times 100$

**Table S6.** Green metric assessment of Suzuki-Miyaura and Sonogashira reactions.

| Solvent   | Suzuki-Miyaura reaction<br>(Iodobenzene + Phenylboronic acid) |       |            |     |     | Sonogashira reaction<br>(Iodobenzene + Phenylacetylene) |       |            |     |     |
|-----------|---------------------------------------------------------------|-------|------------|-----|-----|---------------------------------------------------------|-------|------------|-----|-----|
|           | TMO                                                           | DEDMO | Eucalyptol | THF | Tol | TMO                                                     | DEDMO | Eucalyptol | THF | Tol |
| Yield (%) | 89                                                            | 86    | 86         | 85  | 88  | 91                                                      | 81    | 76         | 85  | 80  |
| PMI       | 604                                                           | 625   | 627        | 633 | 612 | 512                                                     | 575   | 615        | 549 | 583 |
| RME (%)   | 38                                                            | 37    | 37         | 36  | 38  | 45                                                      | 40    | 38         | 42  | 40  |
| AE (%)    | 47                                                            |       |            |     |     | 55                                                      |       |            |     |     |
| OE (%)    | 81                                                            | 79    | 79         | 77  | 81  | 82                                                      | 73    | 69         | 76  | 73  |

## S7. <sup>1</sup>H and <sup>13</sup>C NMR Spectra of Synthesized Compounds

<sup>1</sup>H NMR (400 MHz, Chloroform-*d*) δ 7.56 – 7.50 (m, 4H), 7.41 – 7.34 (m, 4H), 7.31 – 7.25 (m, 2H).

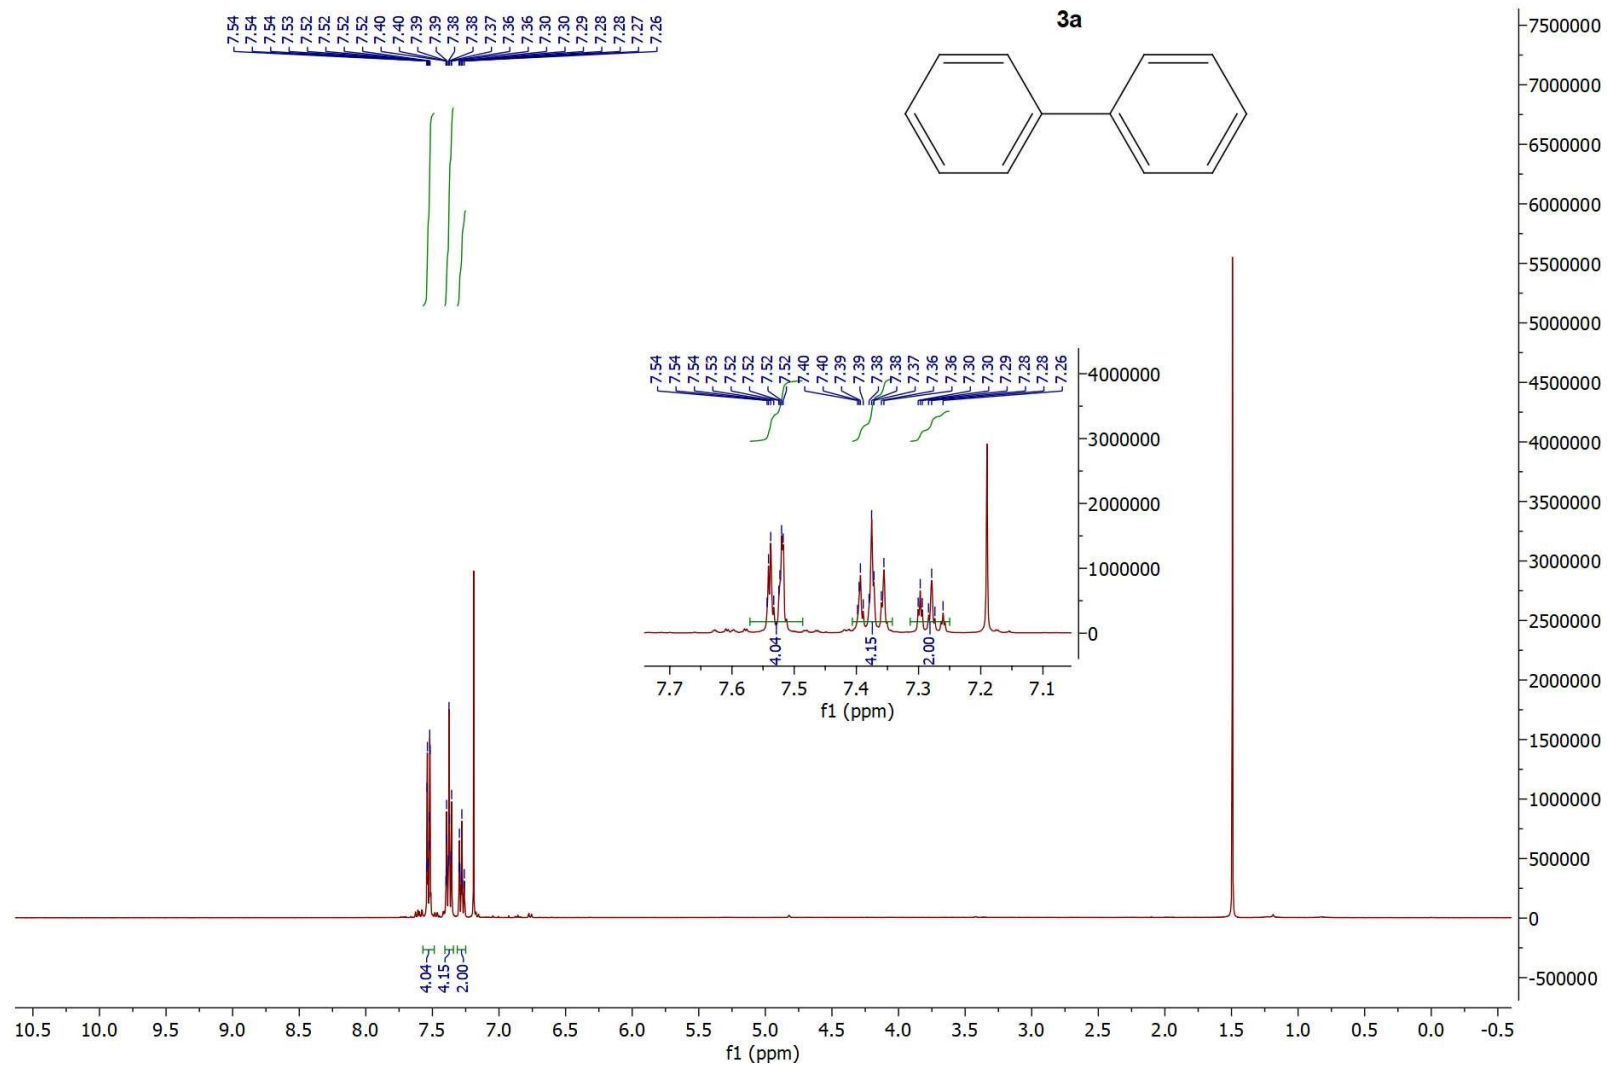

$^1\text{H}$  NMR (400 MHz, Chloroform- $d$ )  $\delta$  7.80 – 7.73 (m, 4H), 7.63 (dd,  $J$  = 8.4, 6.9 Hz, 2H), 7.53 (d,  $J$  = 7.4 Hz, 1H), 7.23 – 7.17 (m, 2H), 4.07 (s, 3H).

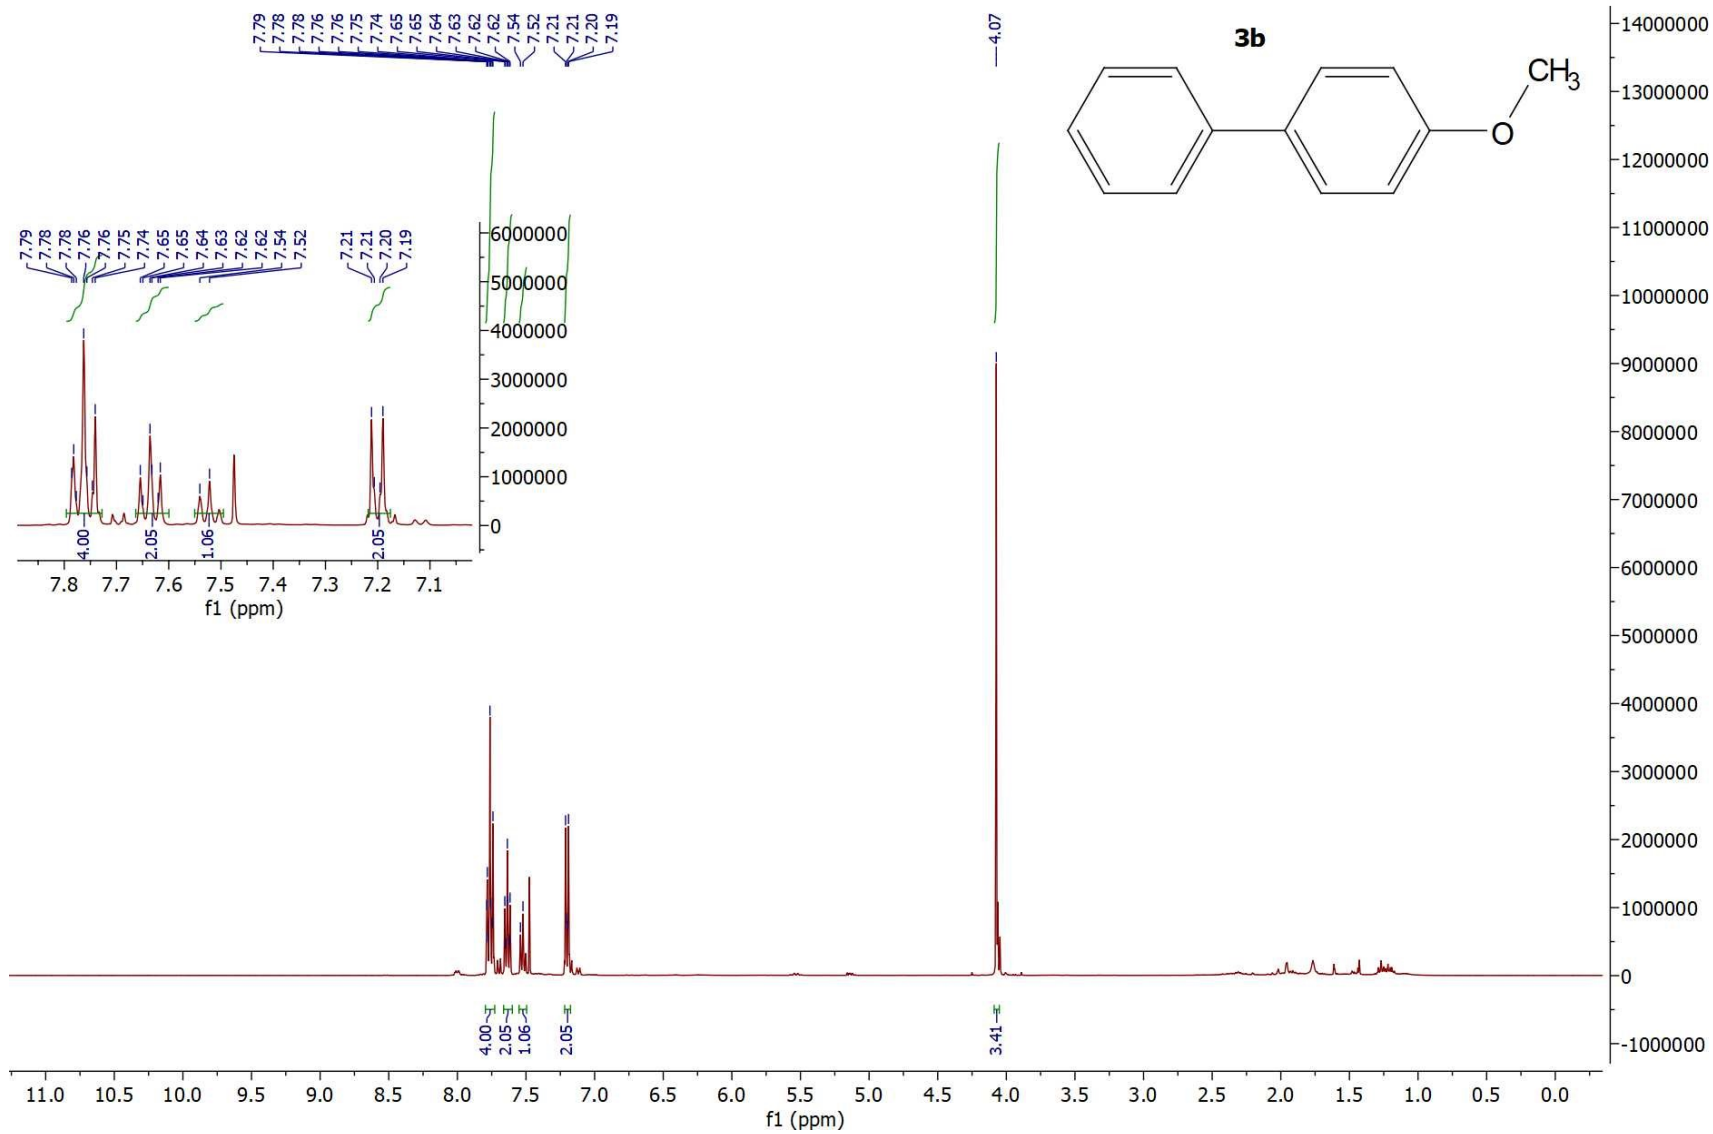

$^1\text{H}$  NMR (400 MHz, Chloroform-*d*)  $\delta$  8.27 – 8.21 (m, 2H), 7.70 – 7.65 (m, 2H), 7.58 – 7.54 (m, 2H), 7.47 – 7.35 (m, 3H).

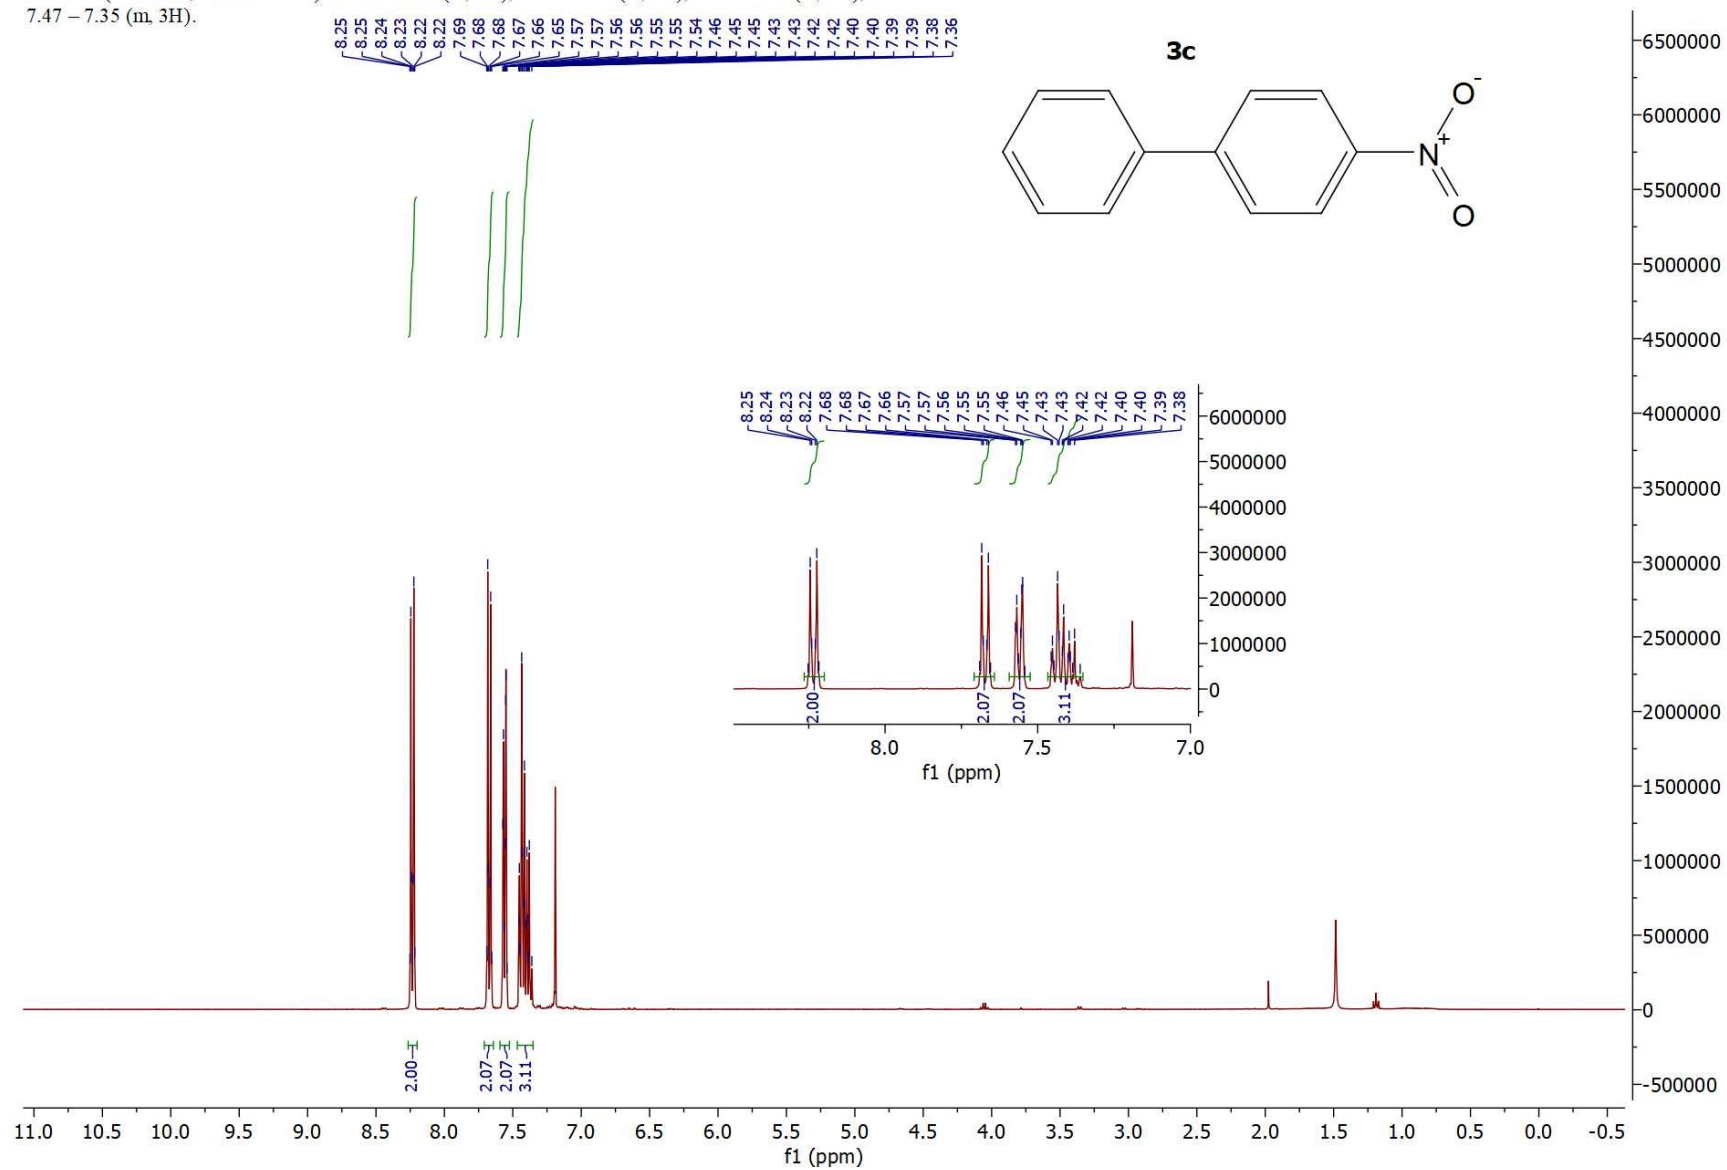



$^1\text{H}$  NMR (400 MHz, Chloroform-*d*)  $\delta$  7.59 (dd,  $J = 7.8, 1.8$  Hz, 2H), 7.46 (t,  $J = 7.3$  Hz, 2H), 7.41 – 7.34 (m, 3H), 7.17 – 6.99 (m, 2H), 3.84 (s, 3H).

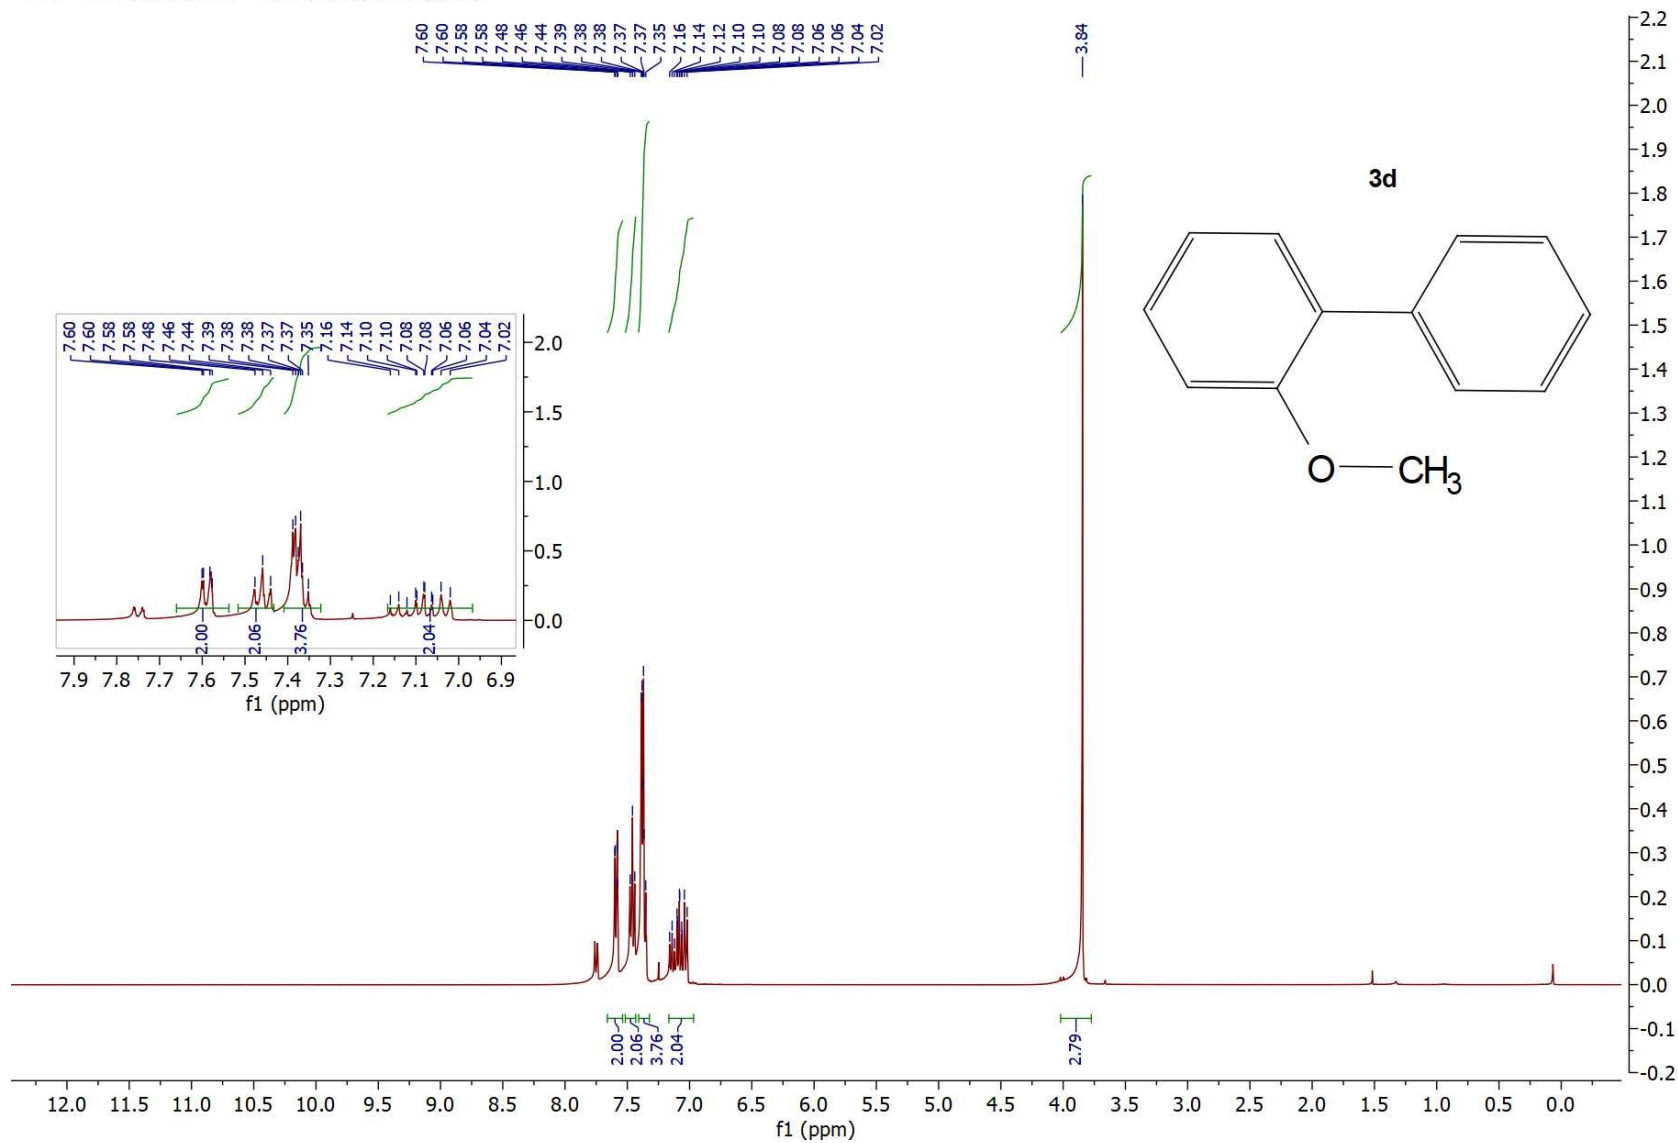

$^{13}\text{C}$  NMR (101 MHz, CHLOROFORM- $D$ )  $\delta$  156.61, 138.70, 137.64, 134.01, 131.06, 129.71, 128.78, 128.15, 127.08, 120.99, 111.37, 55.68.

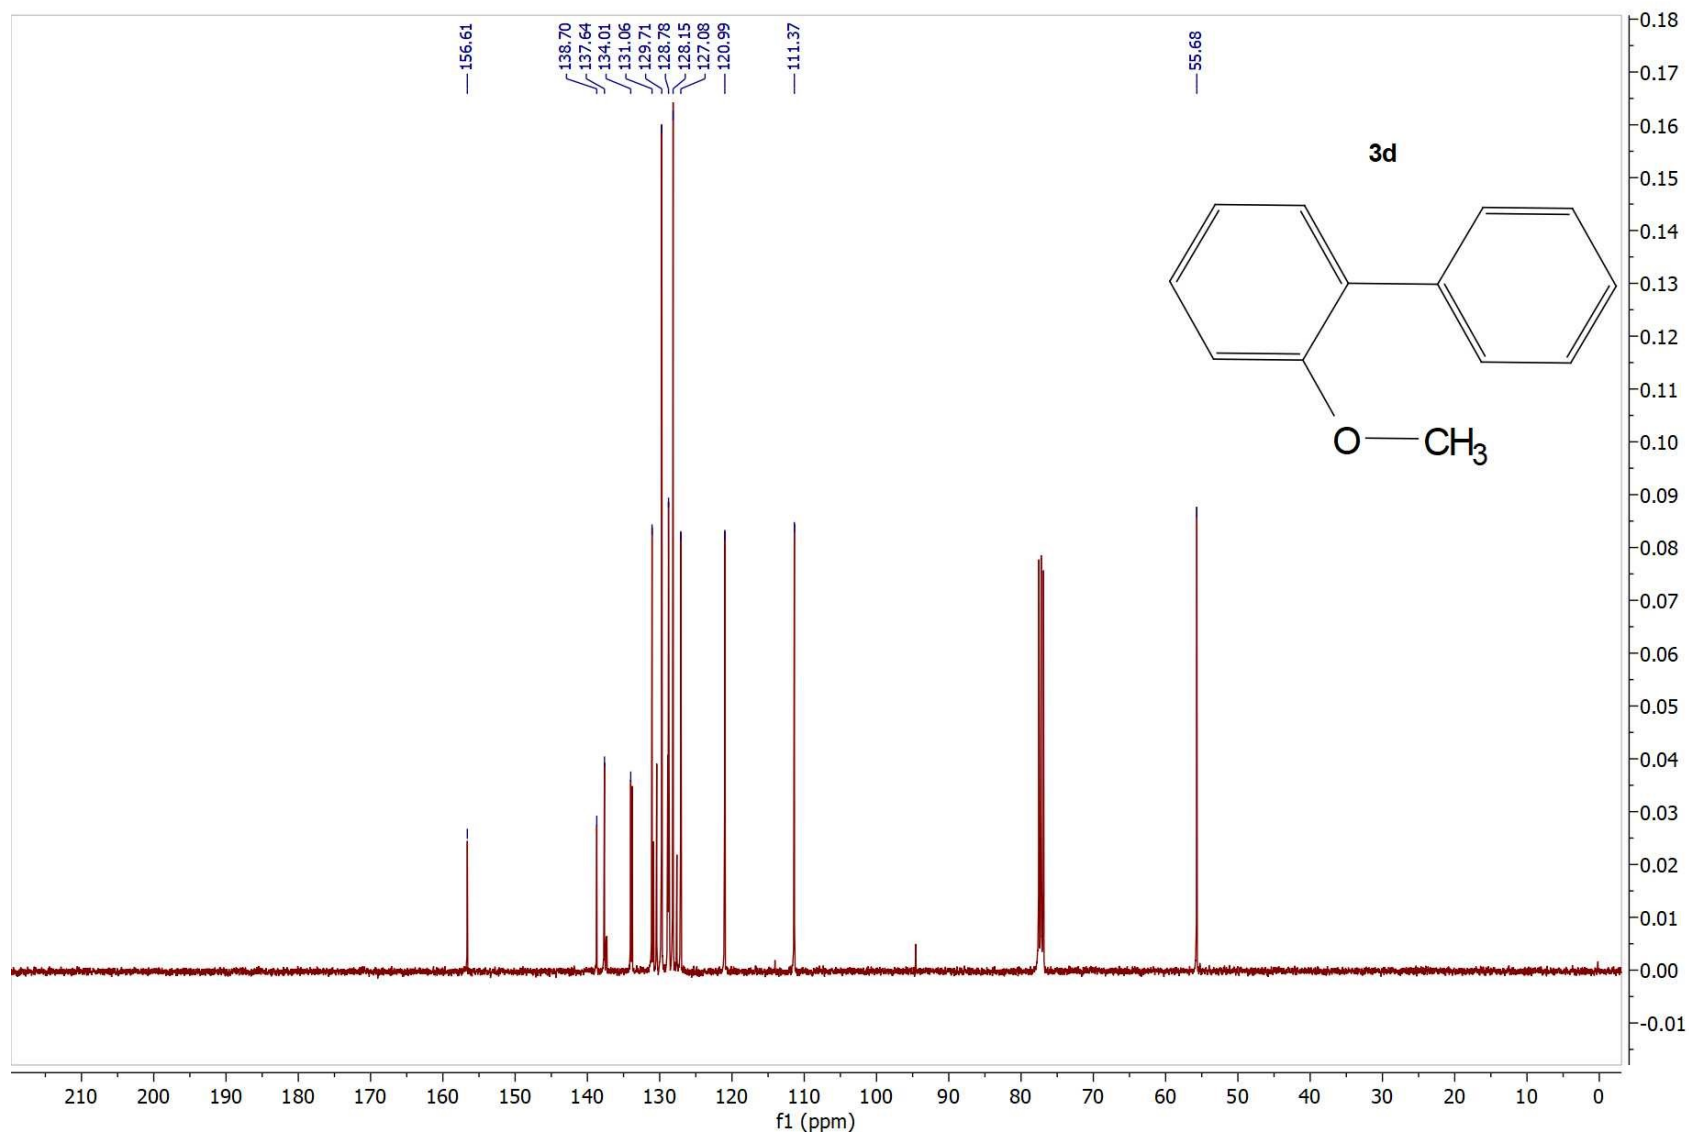

$^1\text{H}$  NMR (400 MHz, Chloroform-*d*)  $\delta$  10.05 (s, 1H), 7.98 – 7.92 (m, 2H), 7.78 – 7.72 (m, 2H), 7.67 – 7.60 (m, 2H), 7.50 – 7.44 (m, 2H), 7.44 – 7.37 (m, 1H).

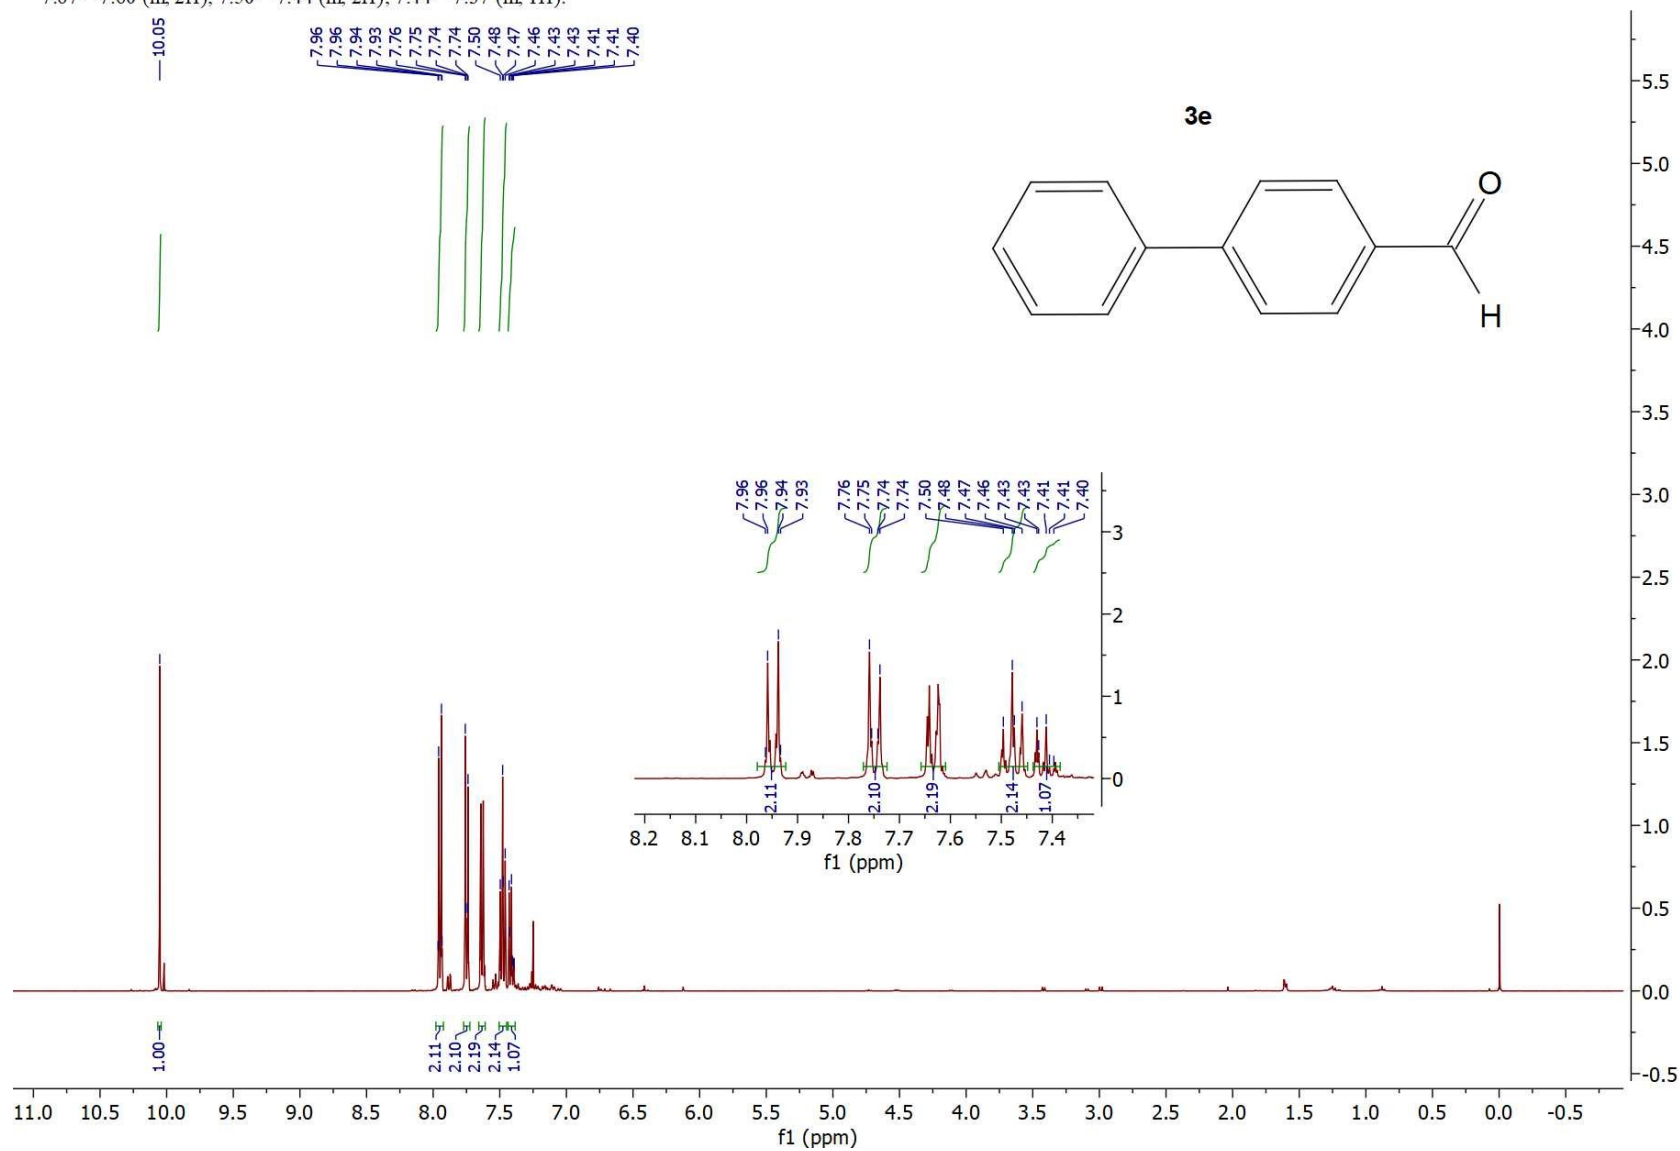

$^{13}\text{C}$  NMR (101 MHz, CHLOROFORM-*D*)  $\delta$  192.05, 147.31, 139.82, 135.30, 130.38, 129.13, 128.59, 127.48.

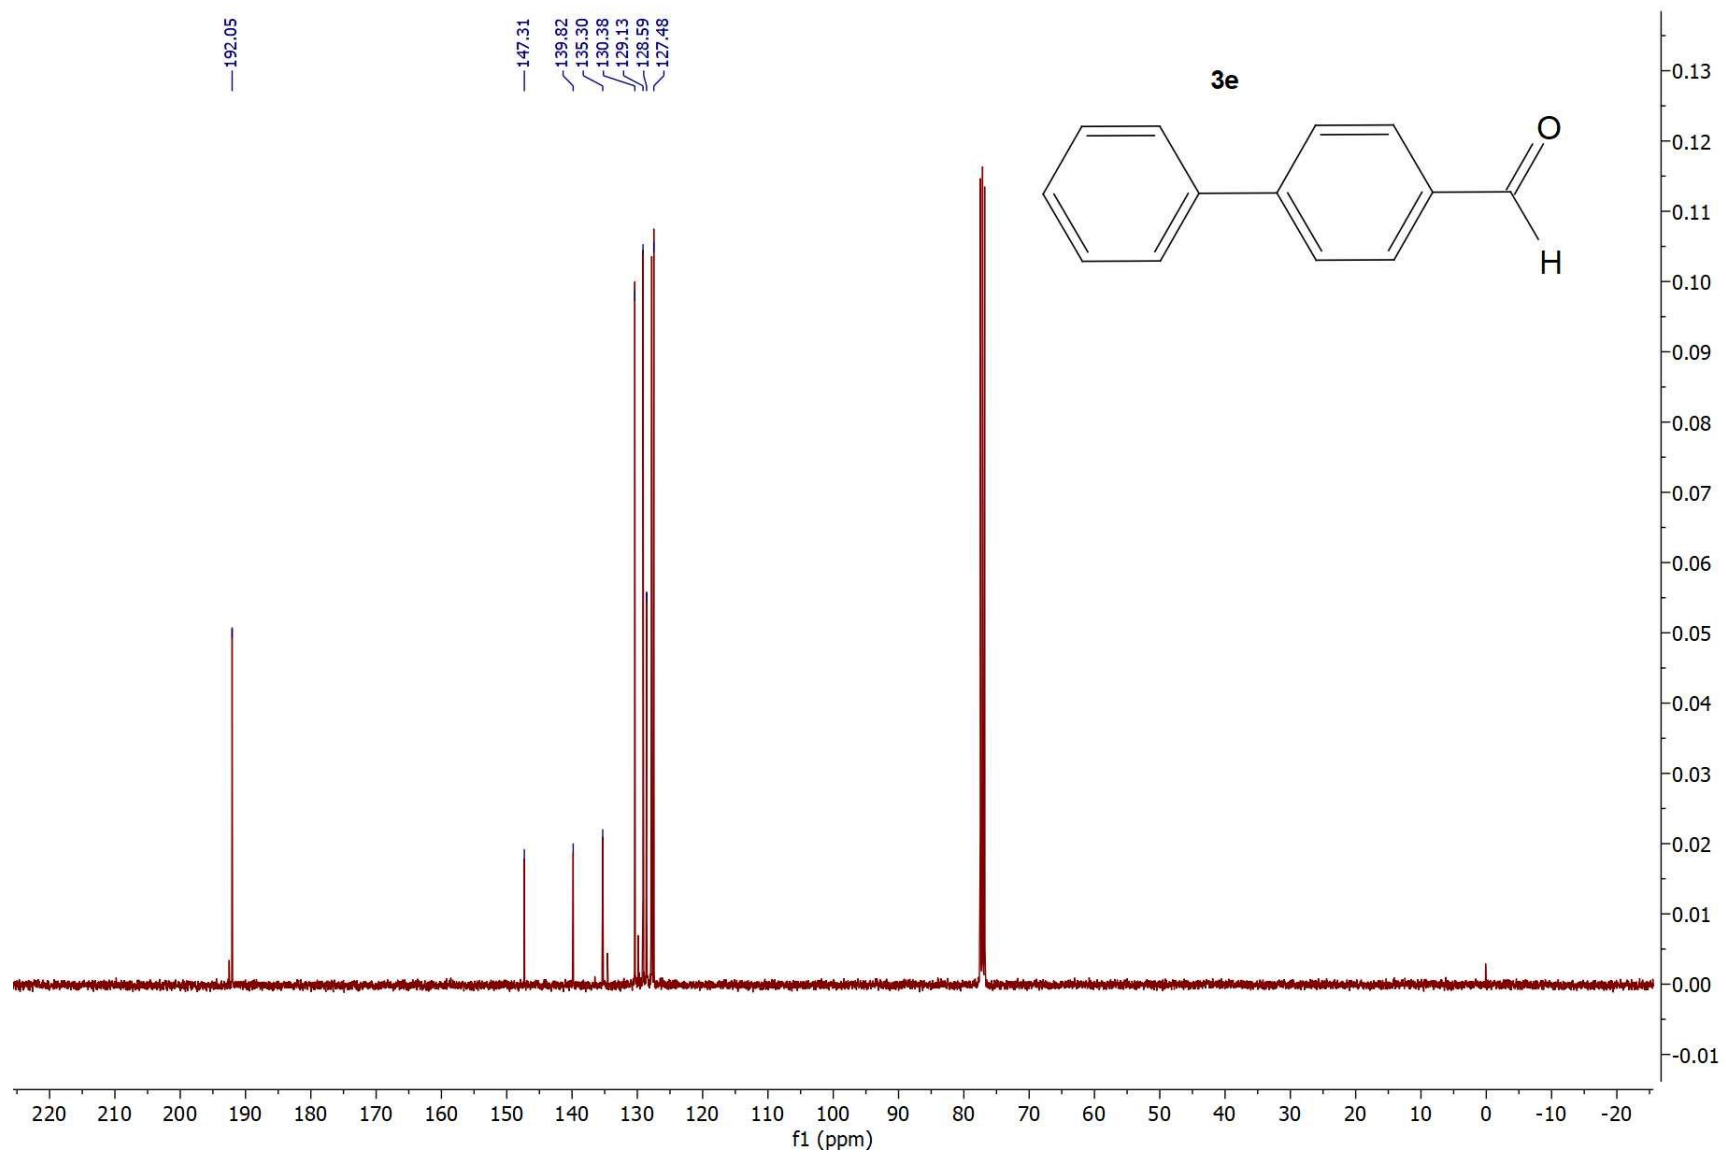

$^1\text{H}$  NMR (400 MHz, Chloroform-*d*)  $\delta$  7.69 (s, 4H), 7.63 – 7.58 (m, 2H), 7.51 – 7.38 (m, 3H).

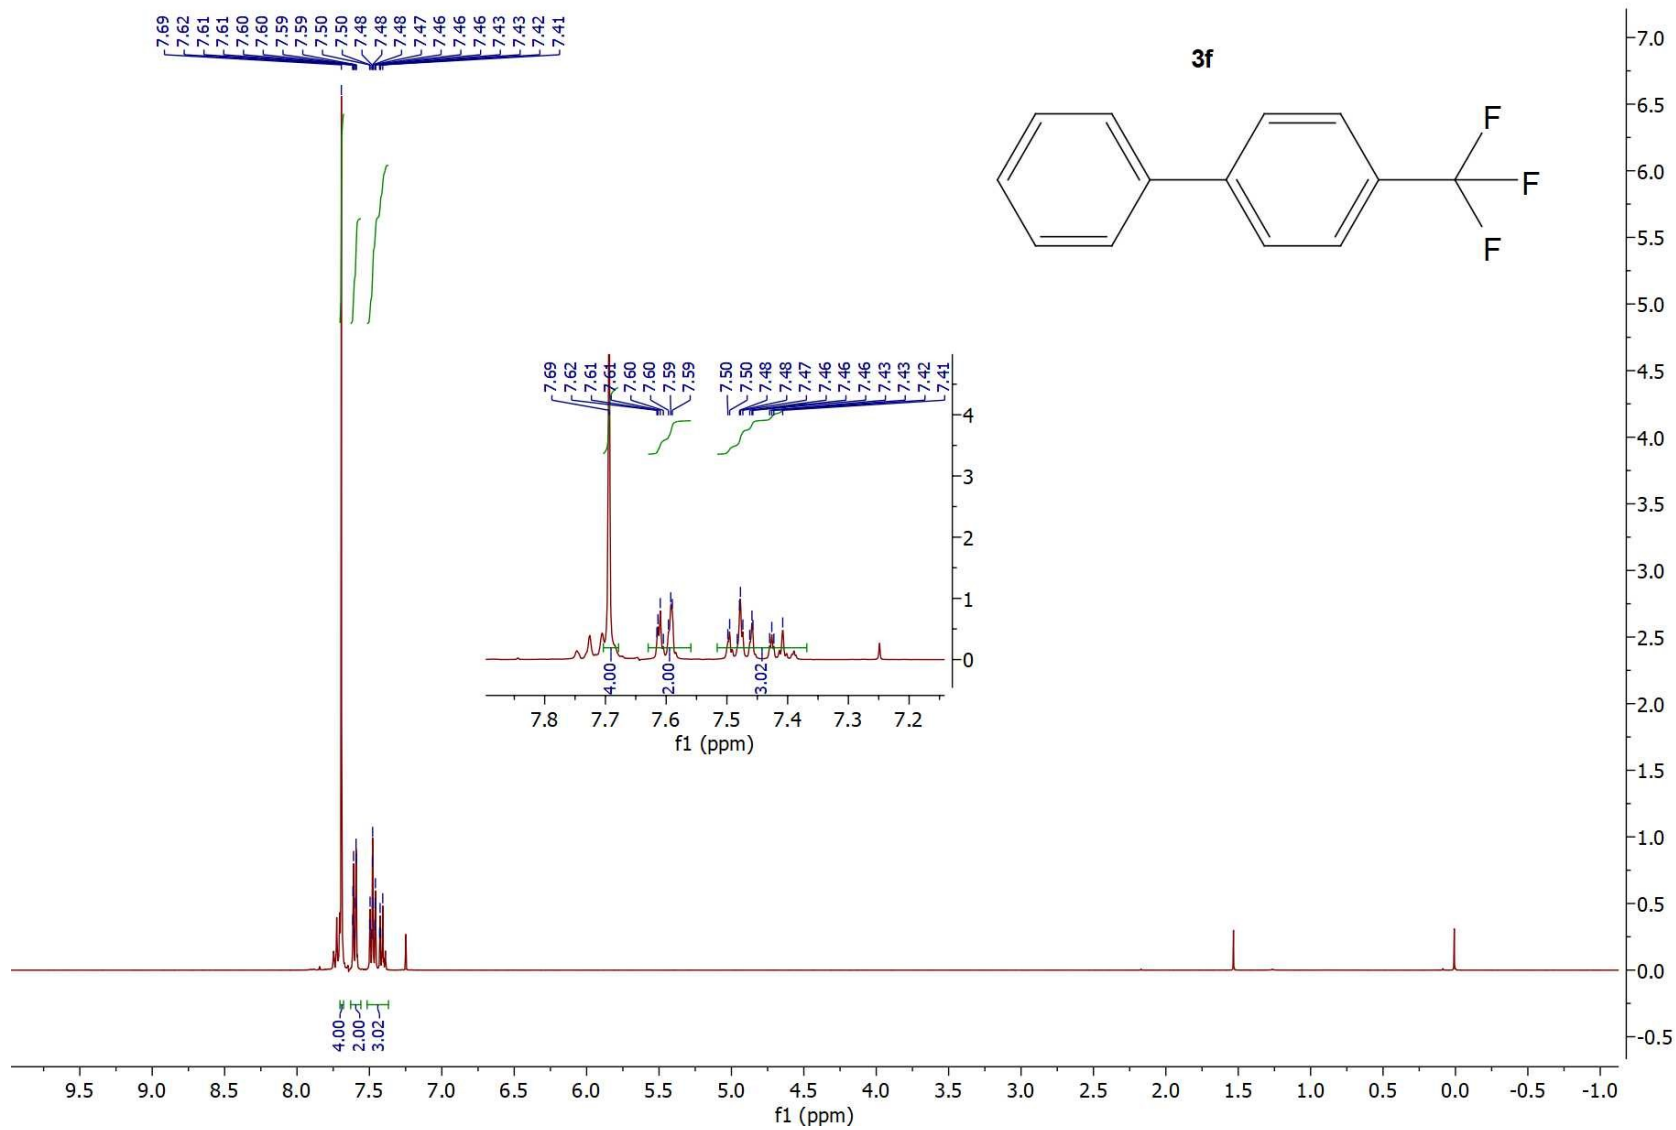

$^{13}\text{C}$  NMR (101 MHz, CHLOROFORM-*D*)  $\delta$  144.84, 139.87, 129.09, 128.29, 127.74, 127.39, 125.83, 125.79, 123.07.

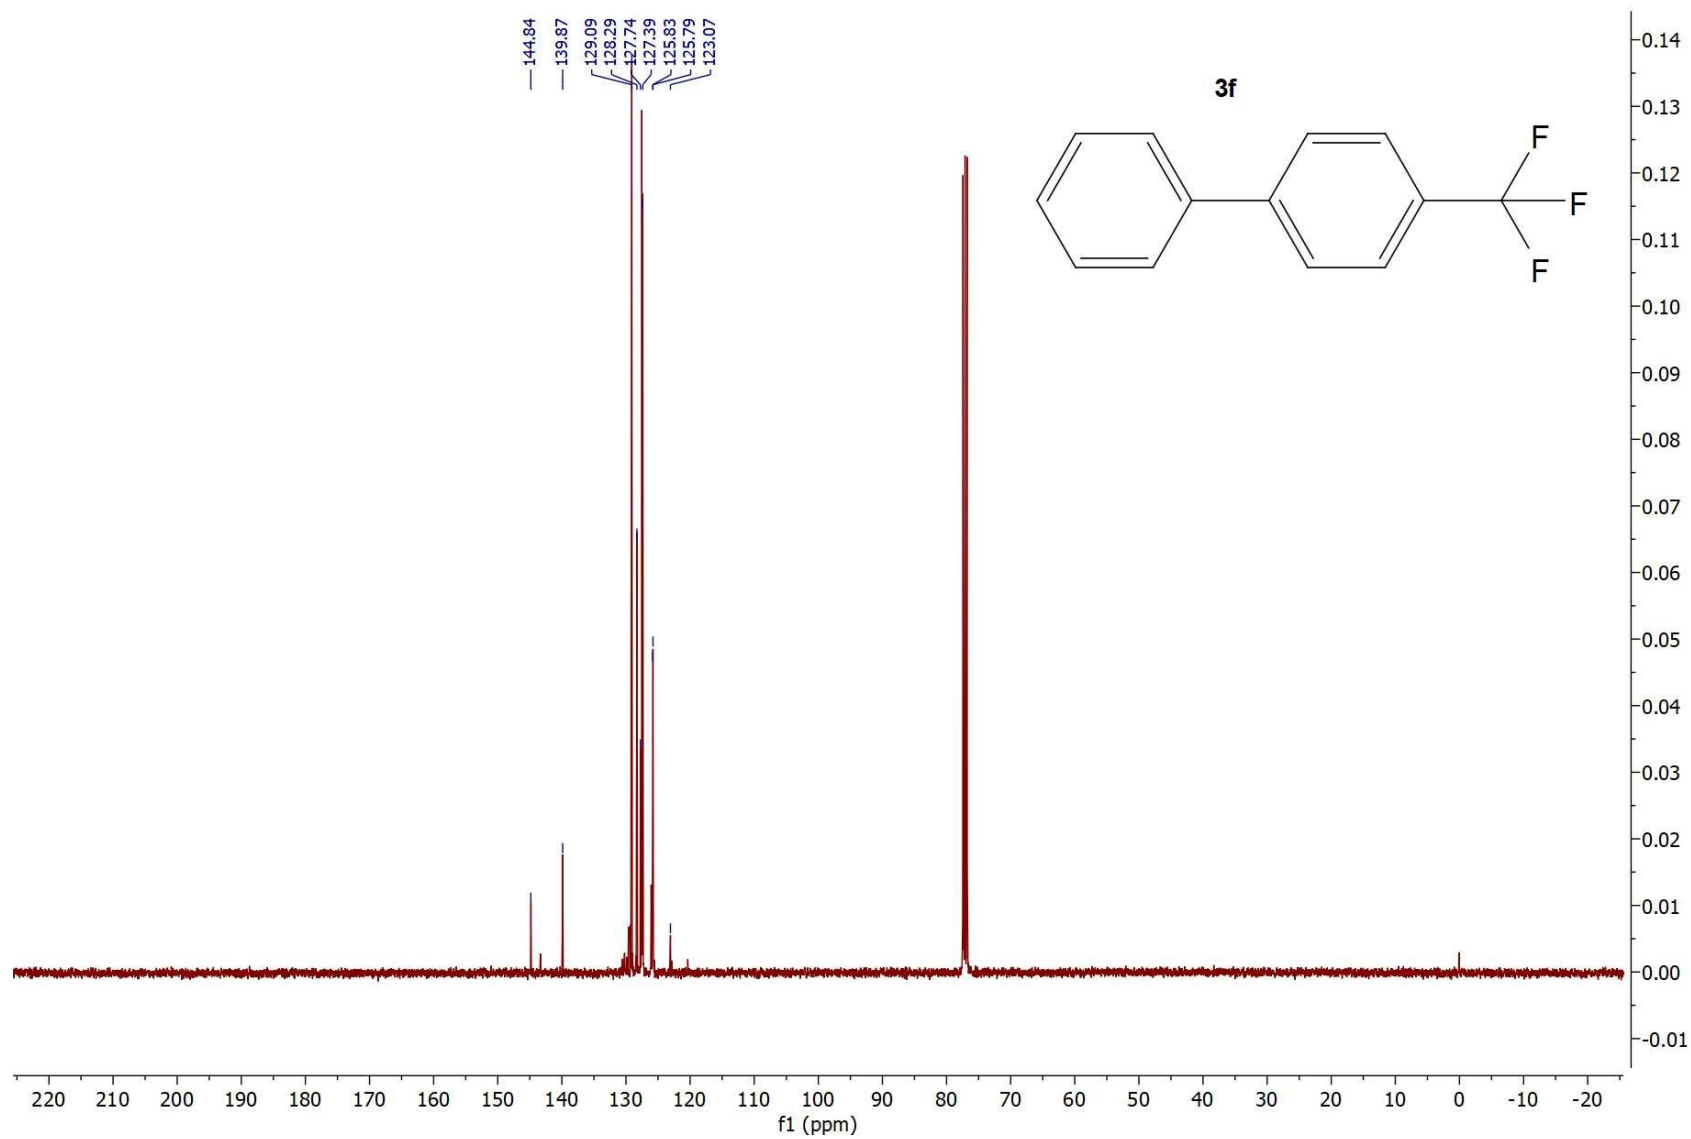

$^1\text{H}$  NMR (400 MHz, Chloroform-*d*)  $\delta$  7.53 – 7.42 (m, 4H), 7.42 – 7.37 (m, 1H), 7.23 – 7.13 (m, 2H).

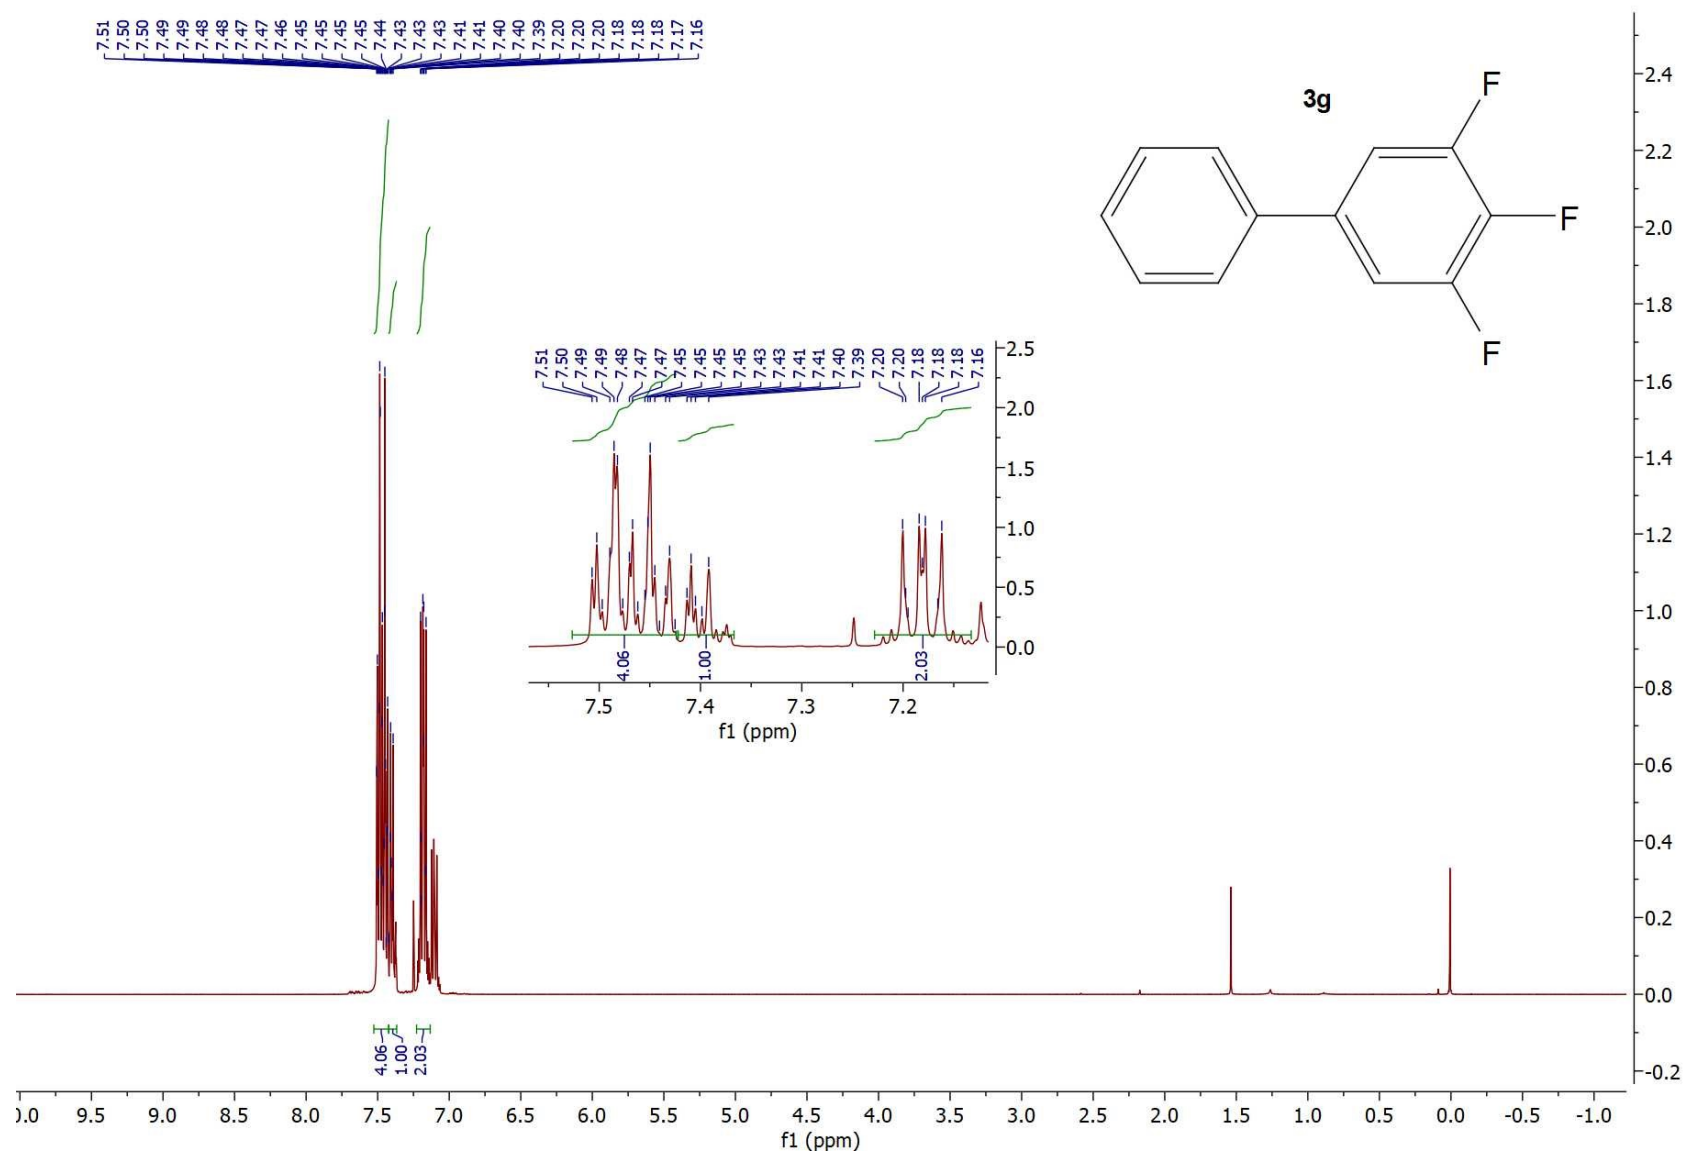

$^{13}\text{C}$  NMR (101 MHz, CHLOROFORM-*D*)  $\delta$  152.79, 150.49, 140.58, 138.31, 137.43, 129.18, 128.48, 126.94, 111.01.

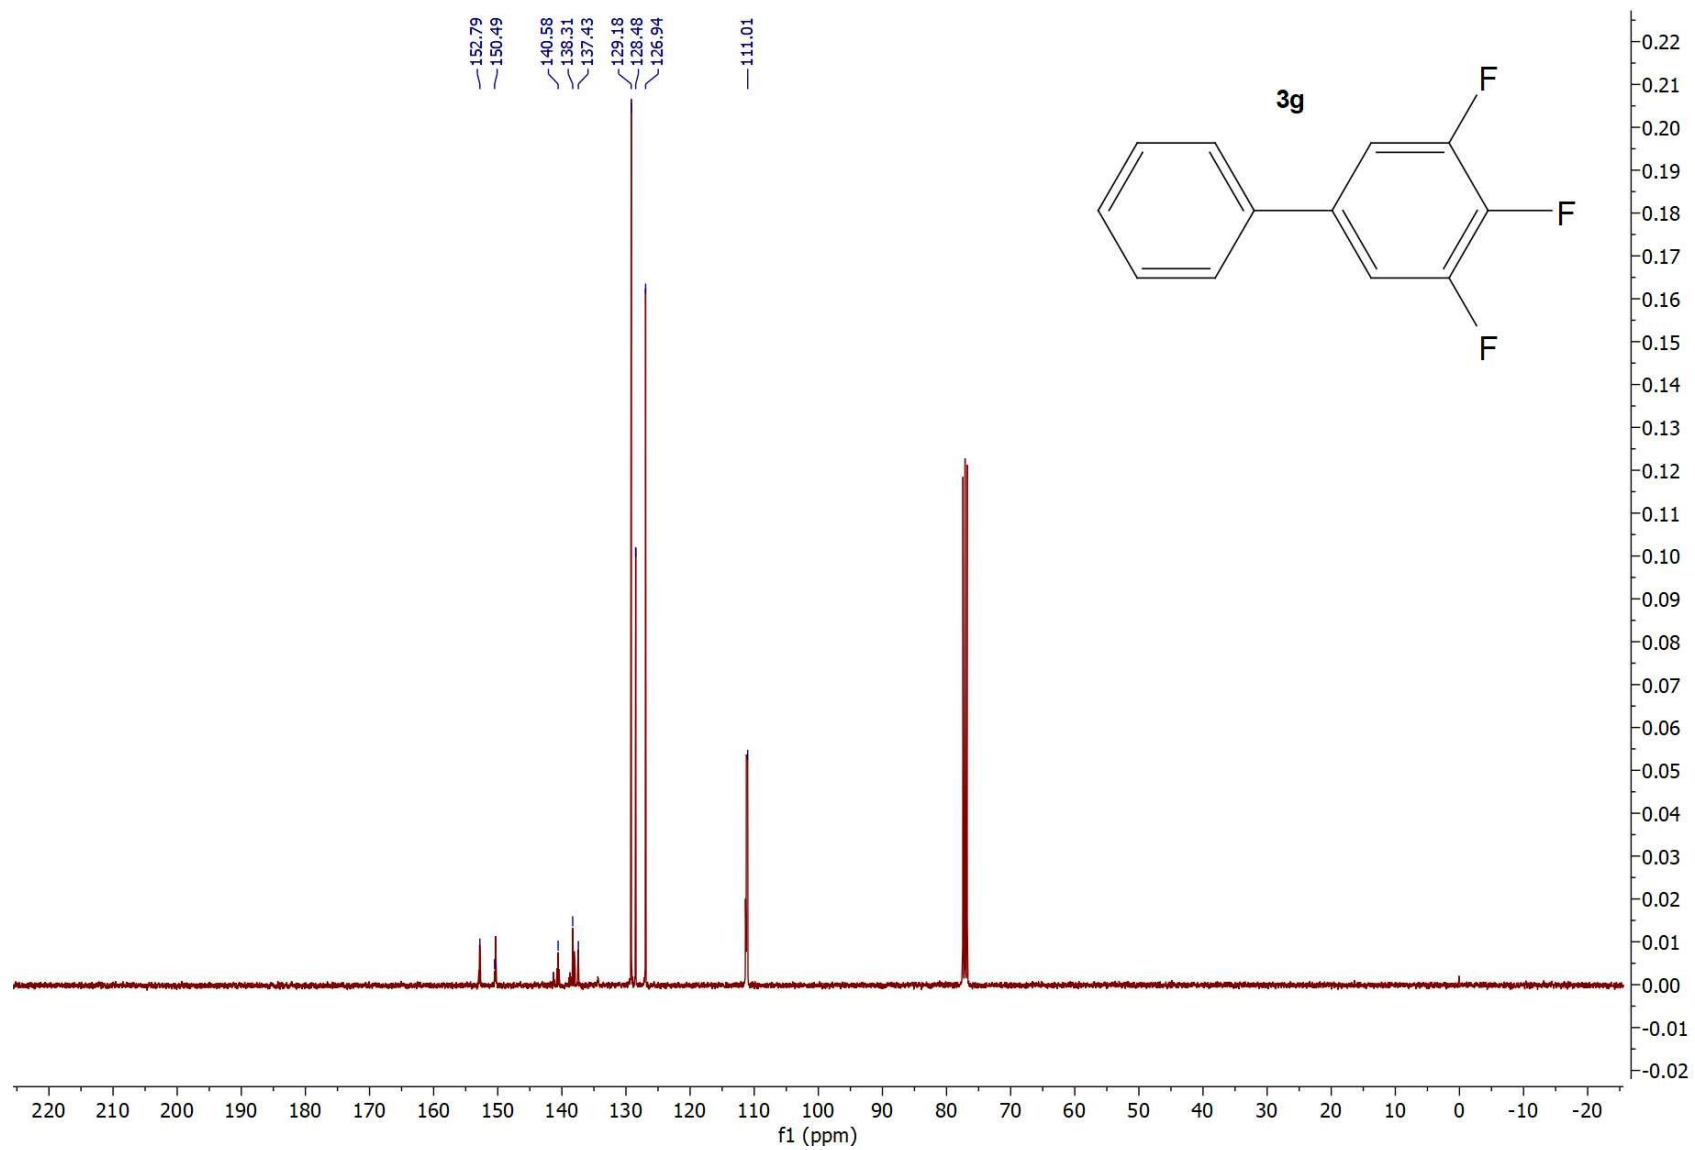



$^1\text{H}$  NMR (400 MHz, Chloroform-*d*)  $\delta$  7.57 – 7.48 (m, 4H), 7.40 – 7.28 (m, 6H).

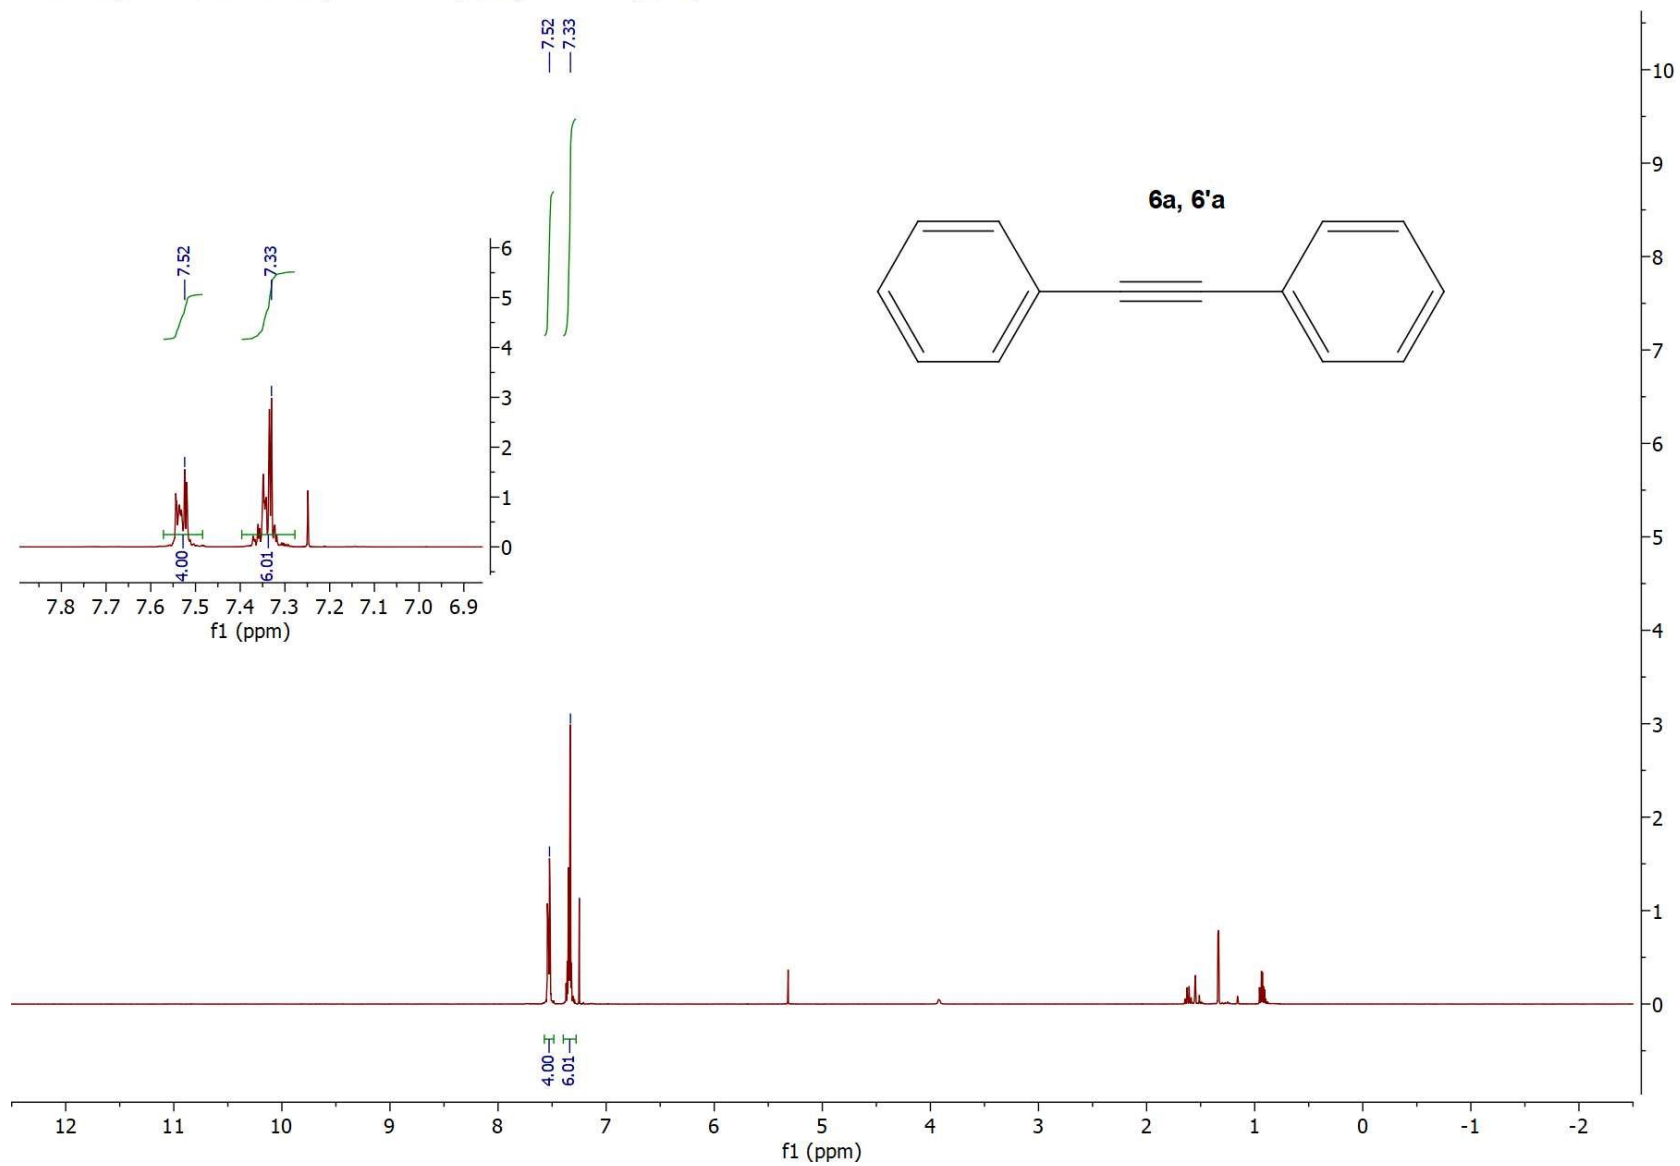

$^{13}\text{C}$  NMR (101 MHz, Chloroform-*d*)  $\delta$  131.71, 128.45, 128.36, 123.37, 89.46

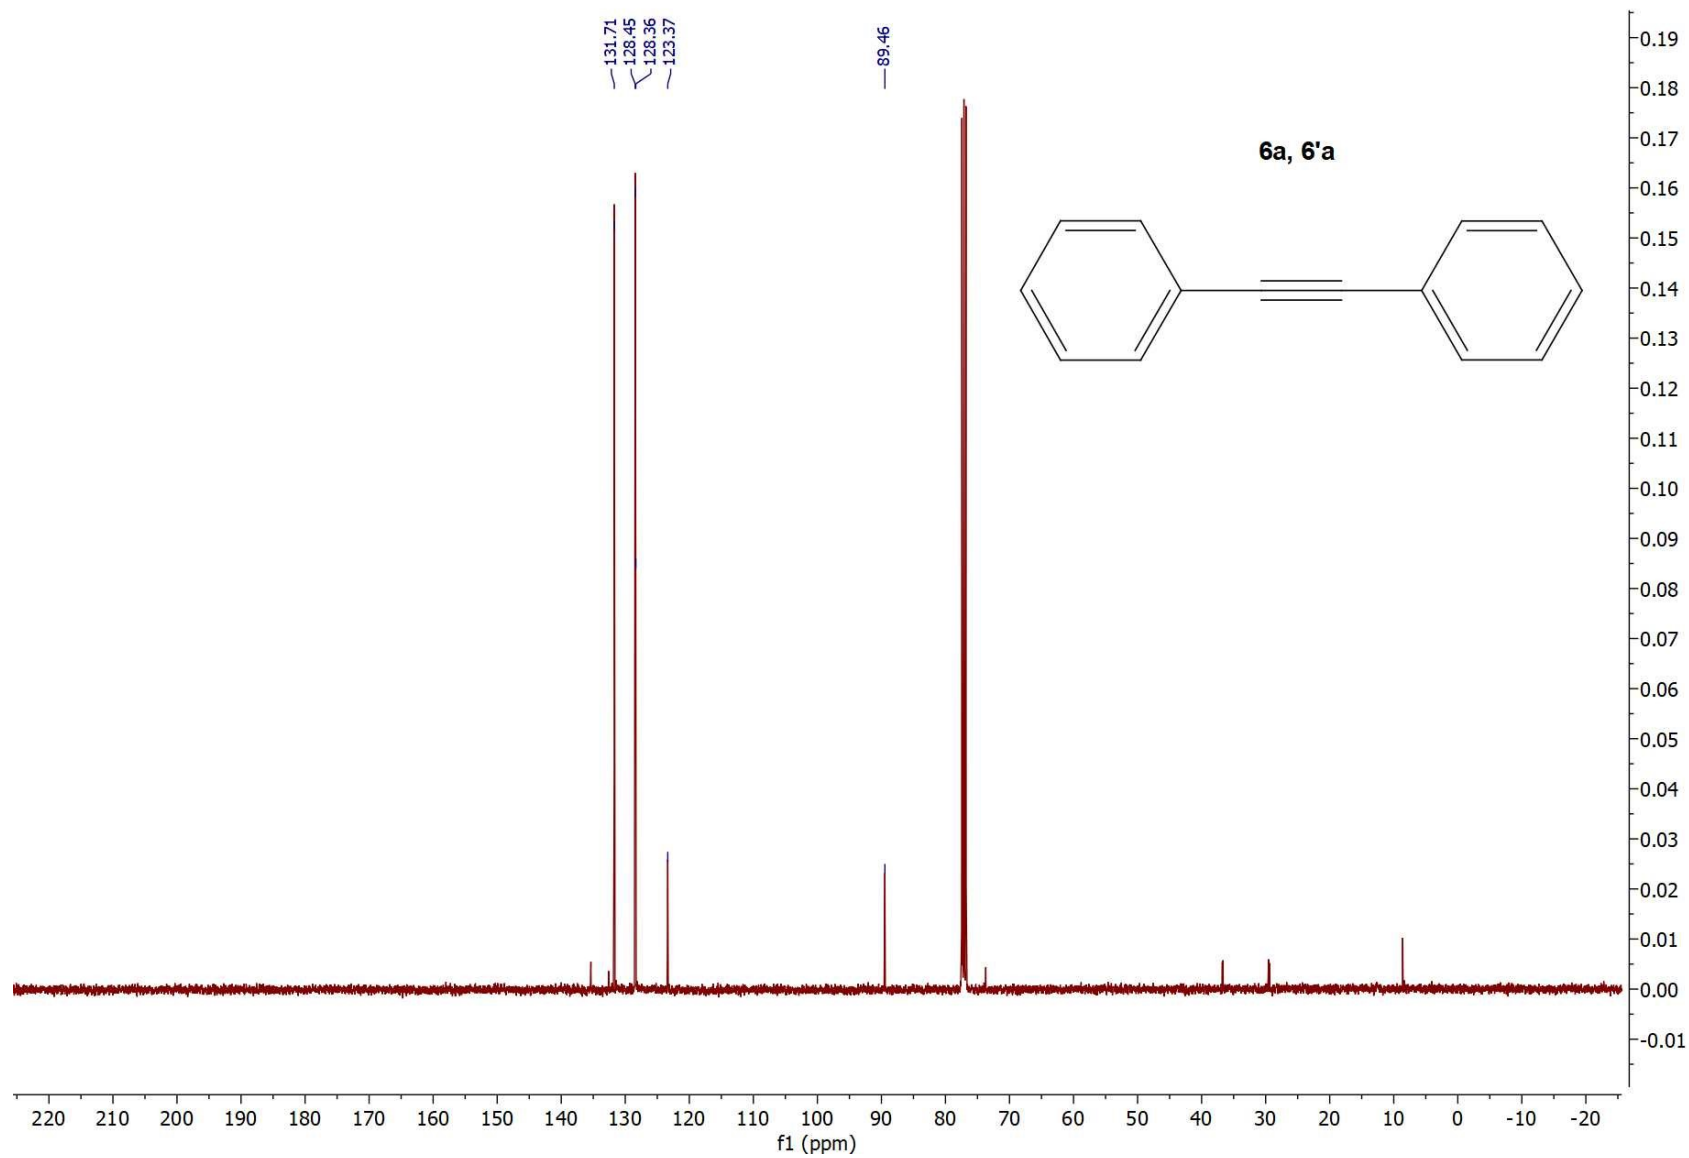

$^1\text{H}$  NMR (400 MHz, Chloroform-*d*)  $\delta$  7.51 (d,  $J = 8.1$  Hz, 2H), 7.48 (s, 2H), 7.36 – 7.29 (m, 3H), 6.87 (d,  $J = 8.9$  Hz, 2H), 3.82 (s, 3H).

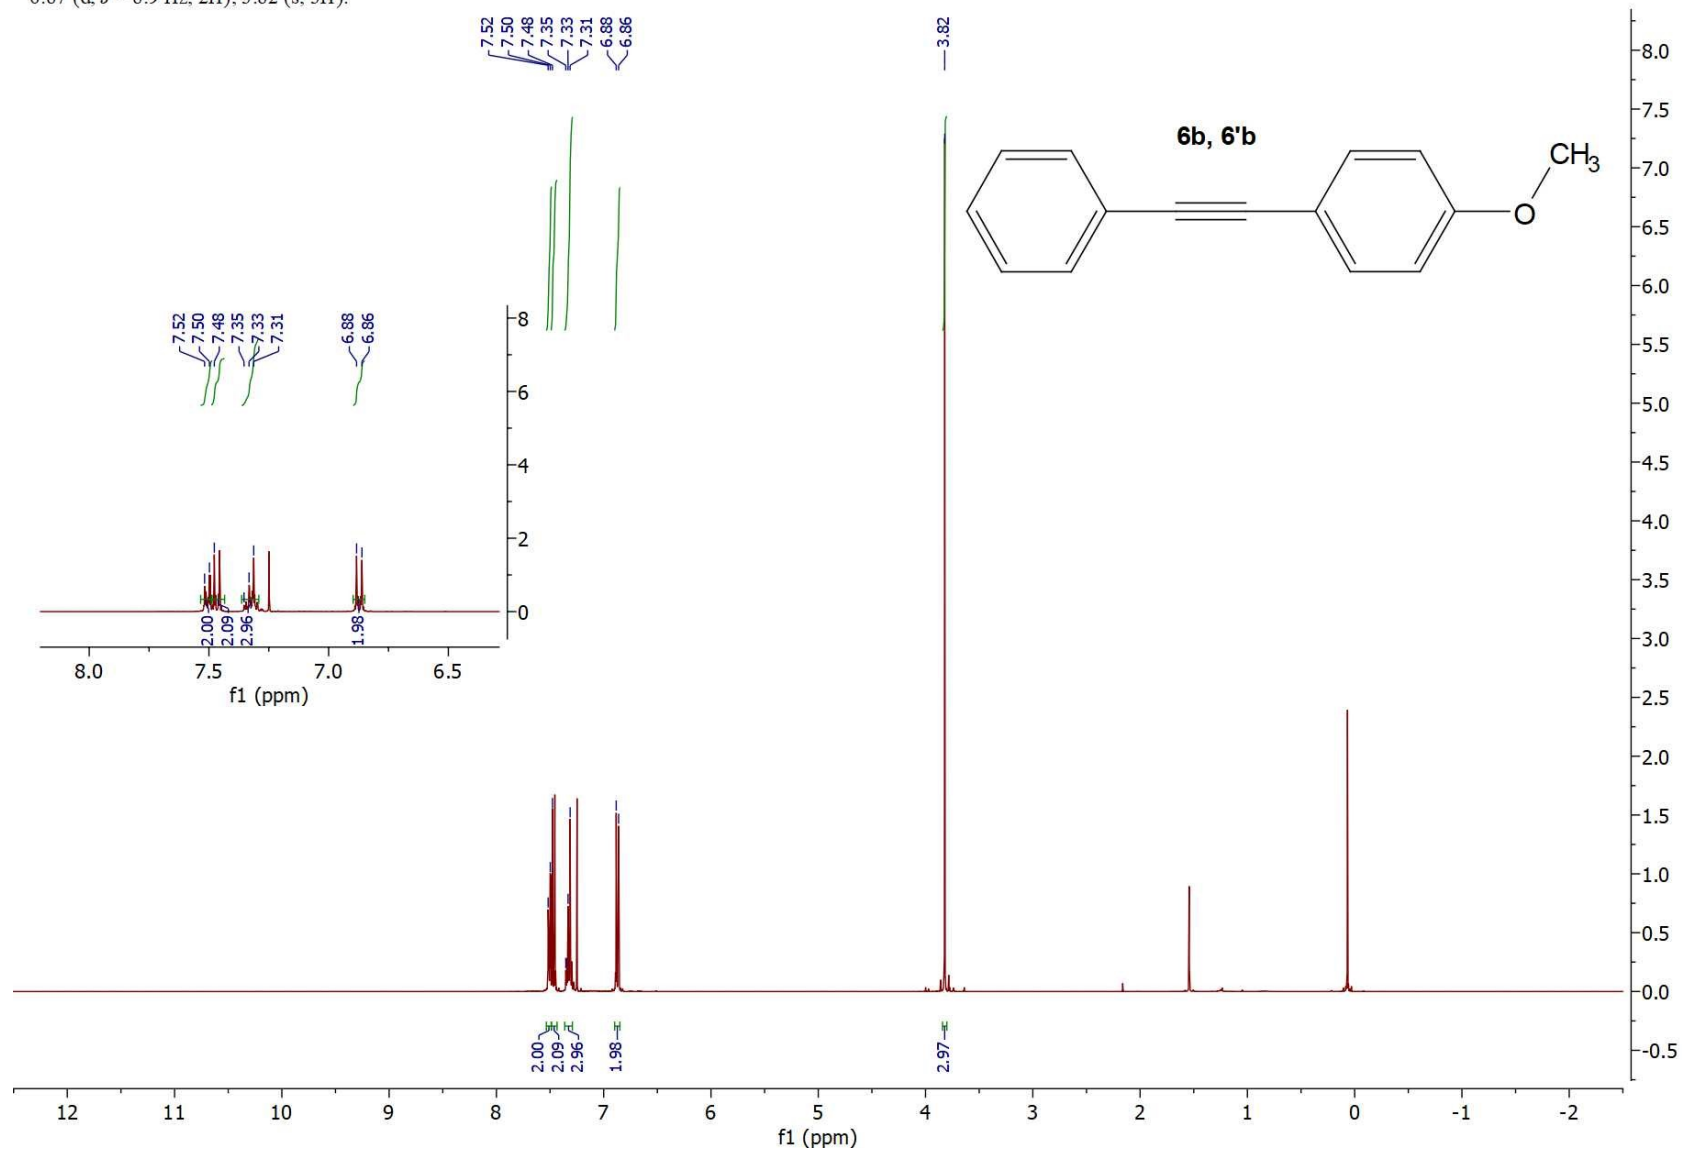

<sup>13</sup>C NMR (101 MHz, Chloroform-*d*) δ 159.71, 133.16, 131.55, 128.41, 128.03, 123.69, 115.47, 114.09, 89.46, 88.16, 55.40.

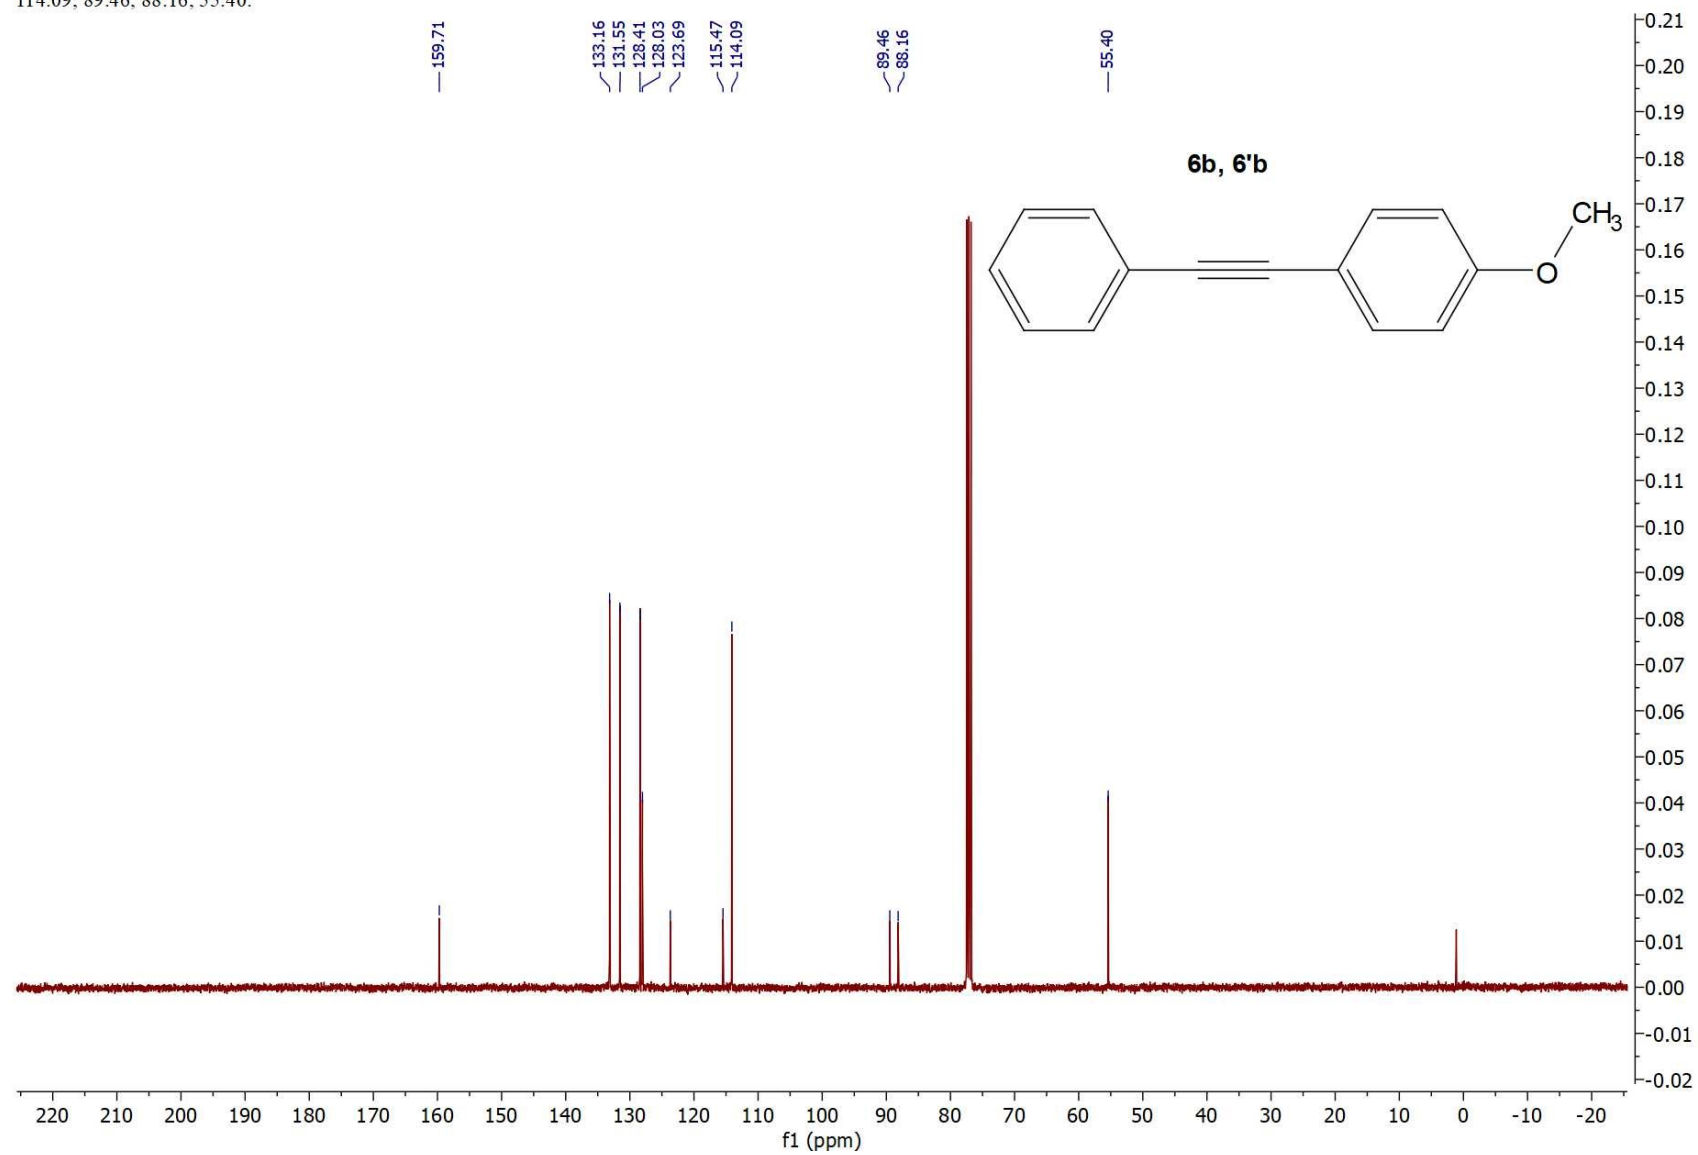

$^1\text{H}$  NMR (400 MHz, Chloroform-*d*)  $\delta$  7.54 – 7.48 (m, 4H), 7.36 – 7.29 (m, 3H), 7.07 – 6.99 (m, 2H).

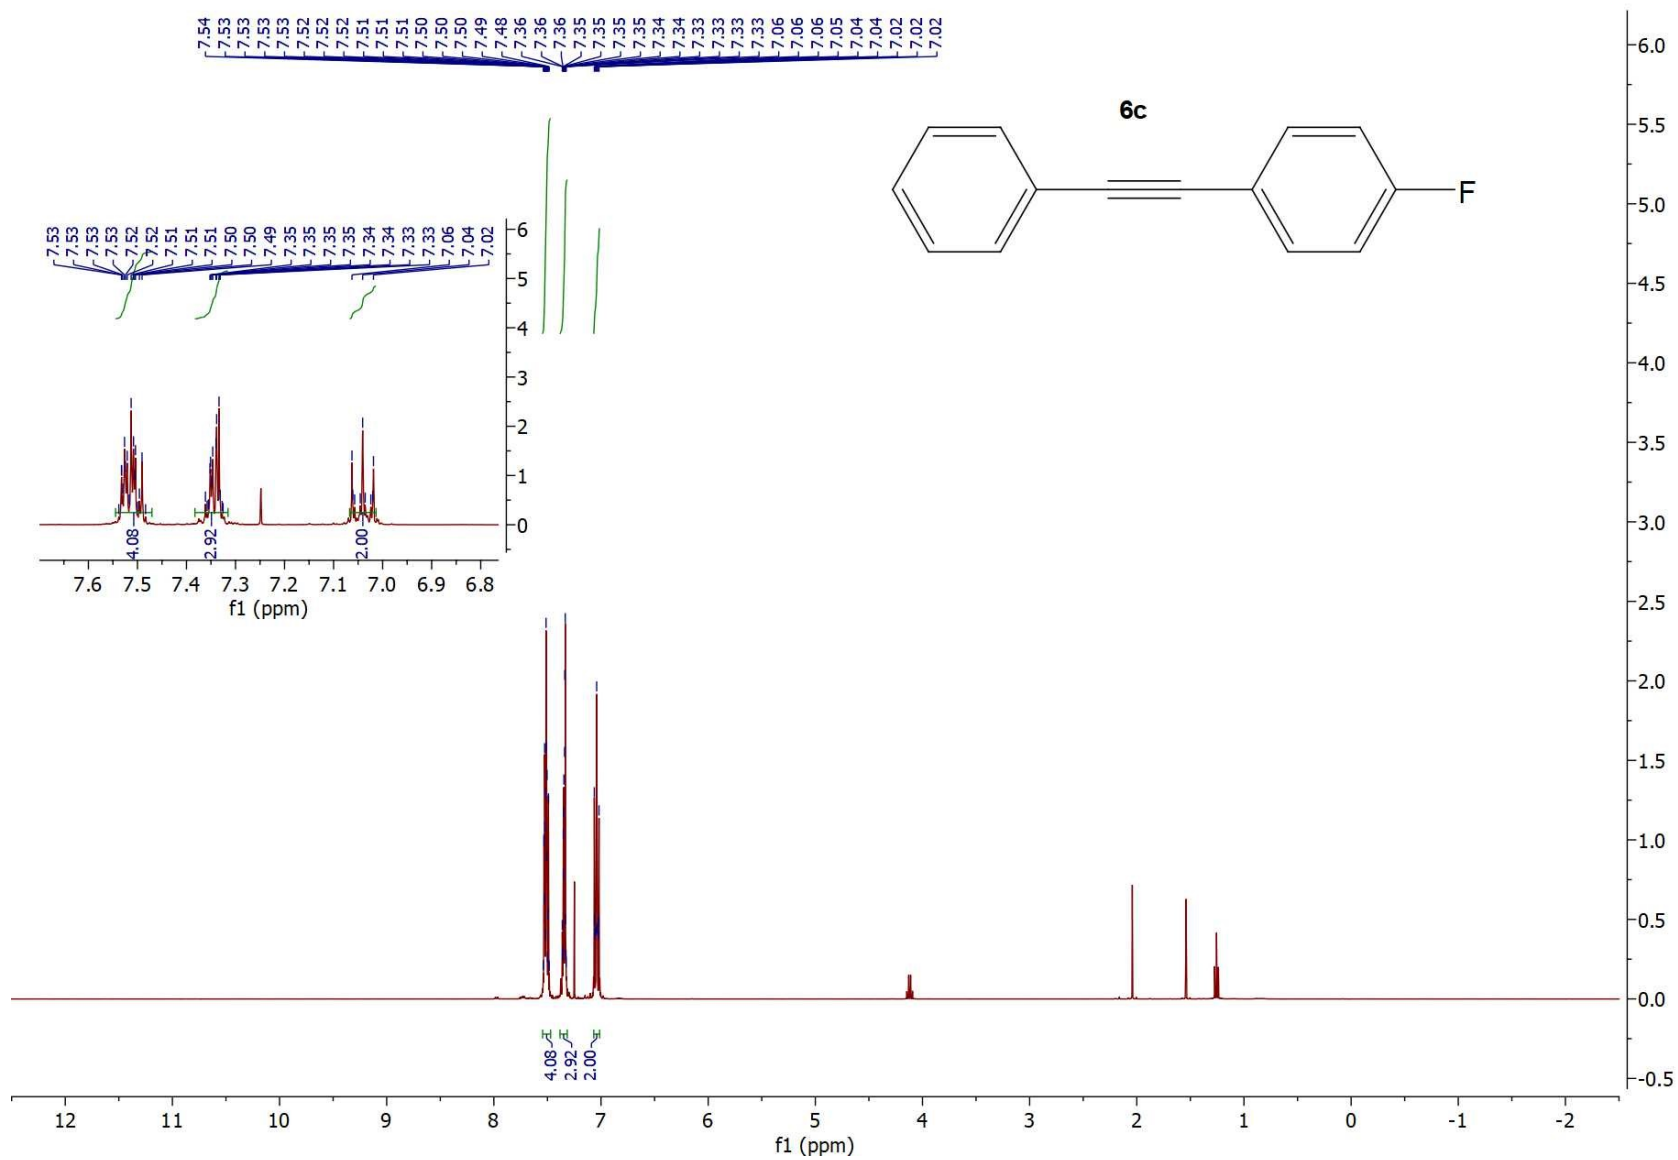

$^{13}\text{C}$  NMR (101 MHz, Chloroform-*d*)  $\delta$  163.84, 133.63, 133.54, 131.66, 128.48, 123.19, 119.45, 115.86, 115.64, 89.13, 88.39.

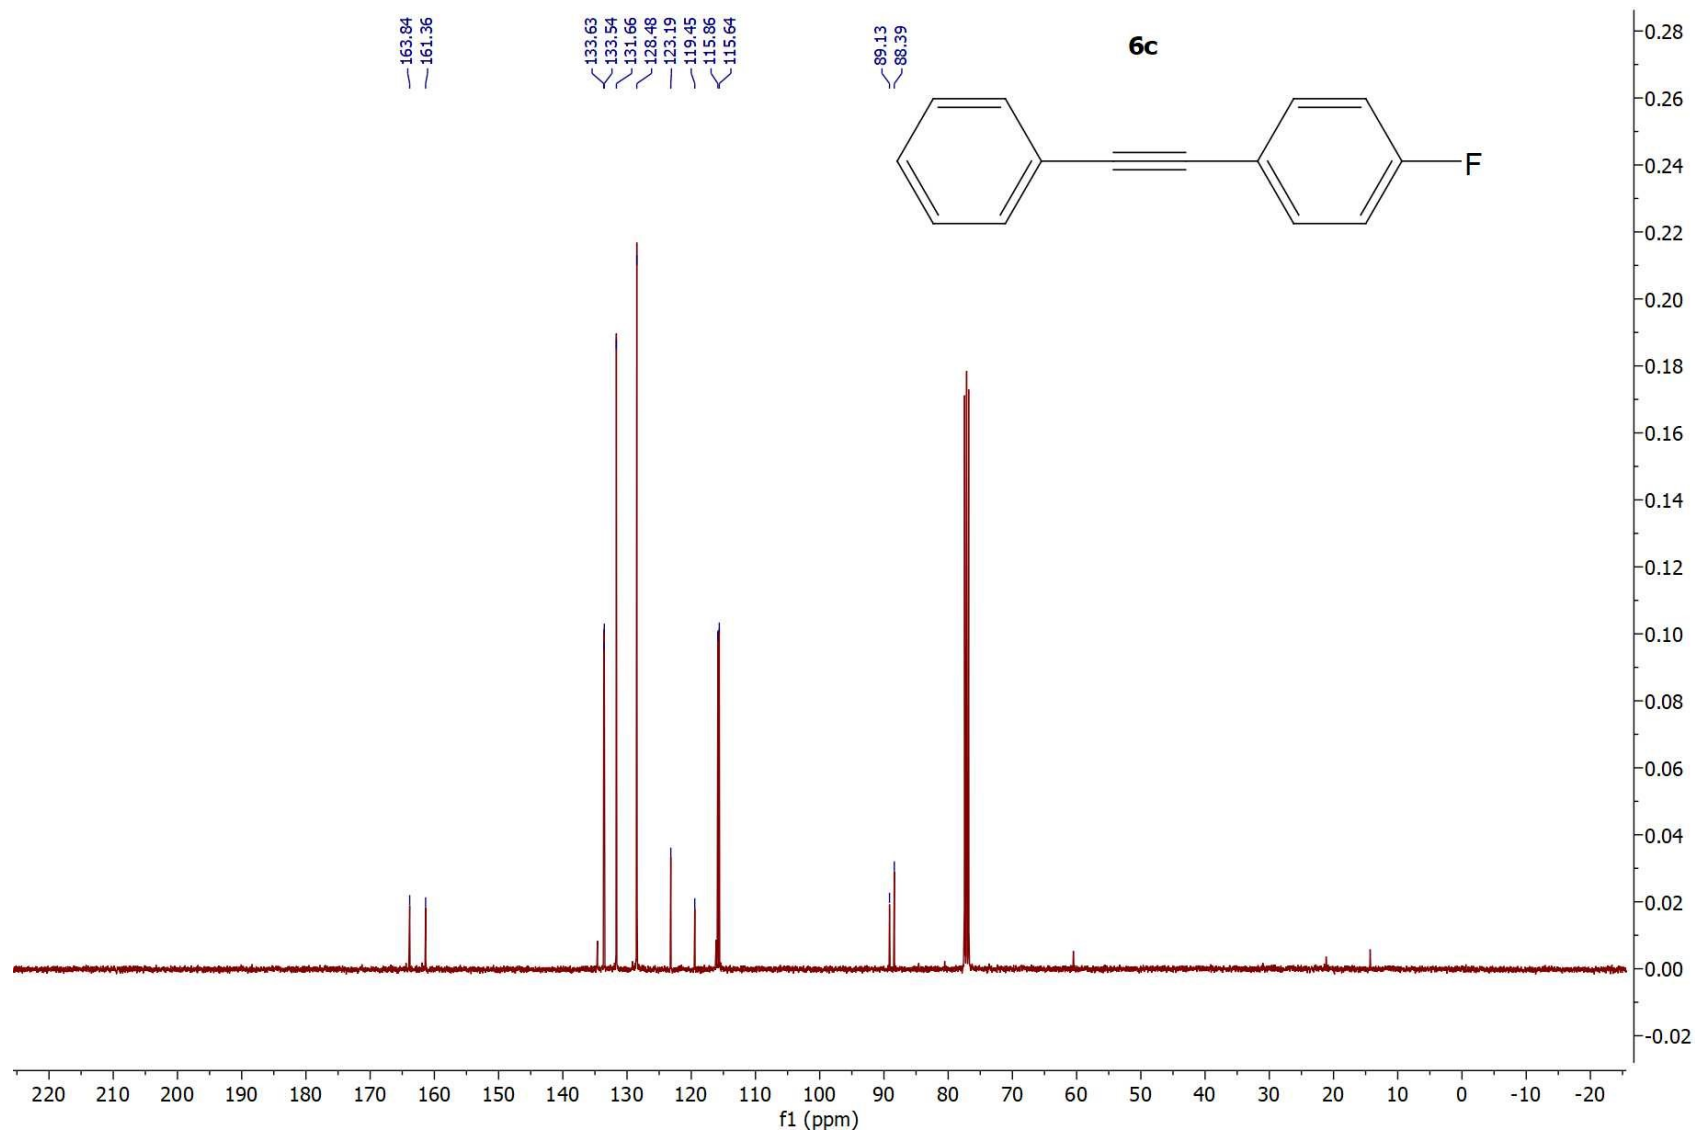

$^1\text{H}$  NMR (400 MHz, Chloroform-*d*)  $\delta$  7.65 – 7.58 (m, 4H), 7.57 – 7.51 (m, 2H), 7.40 – 7.33 (m, 3H).

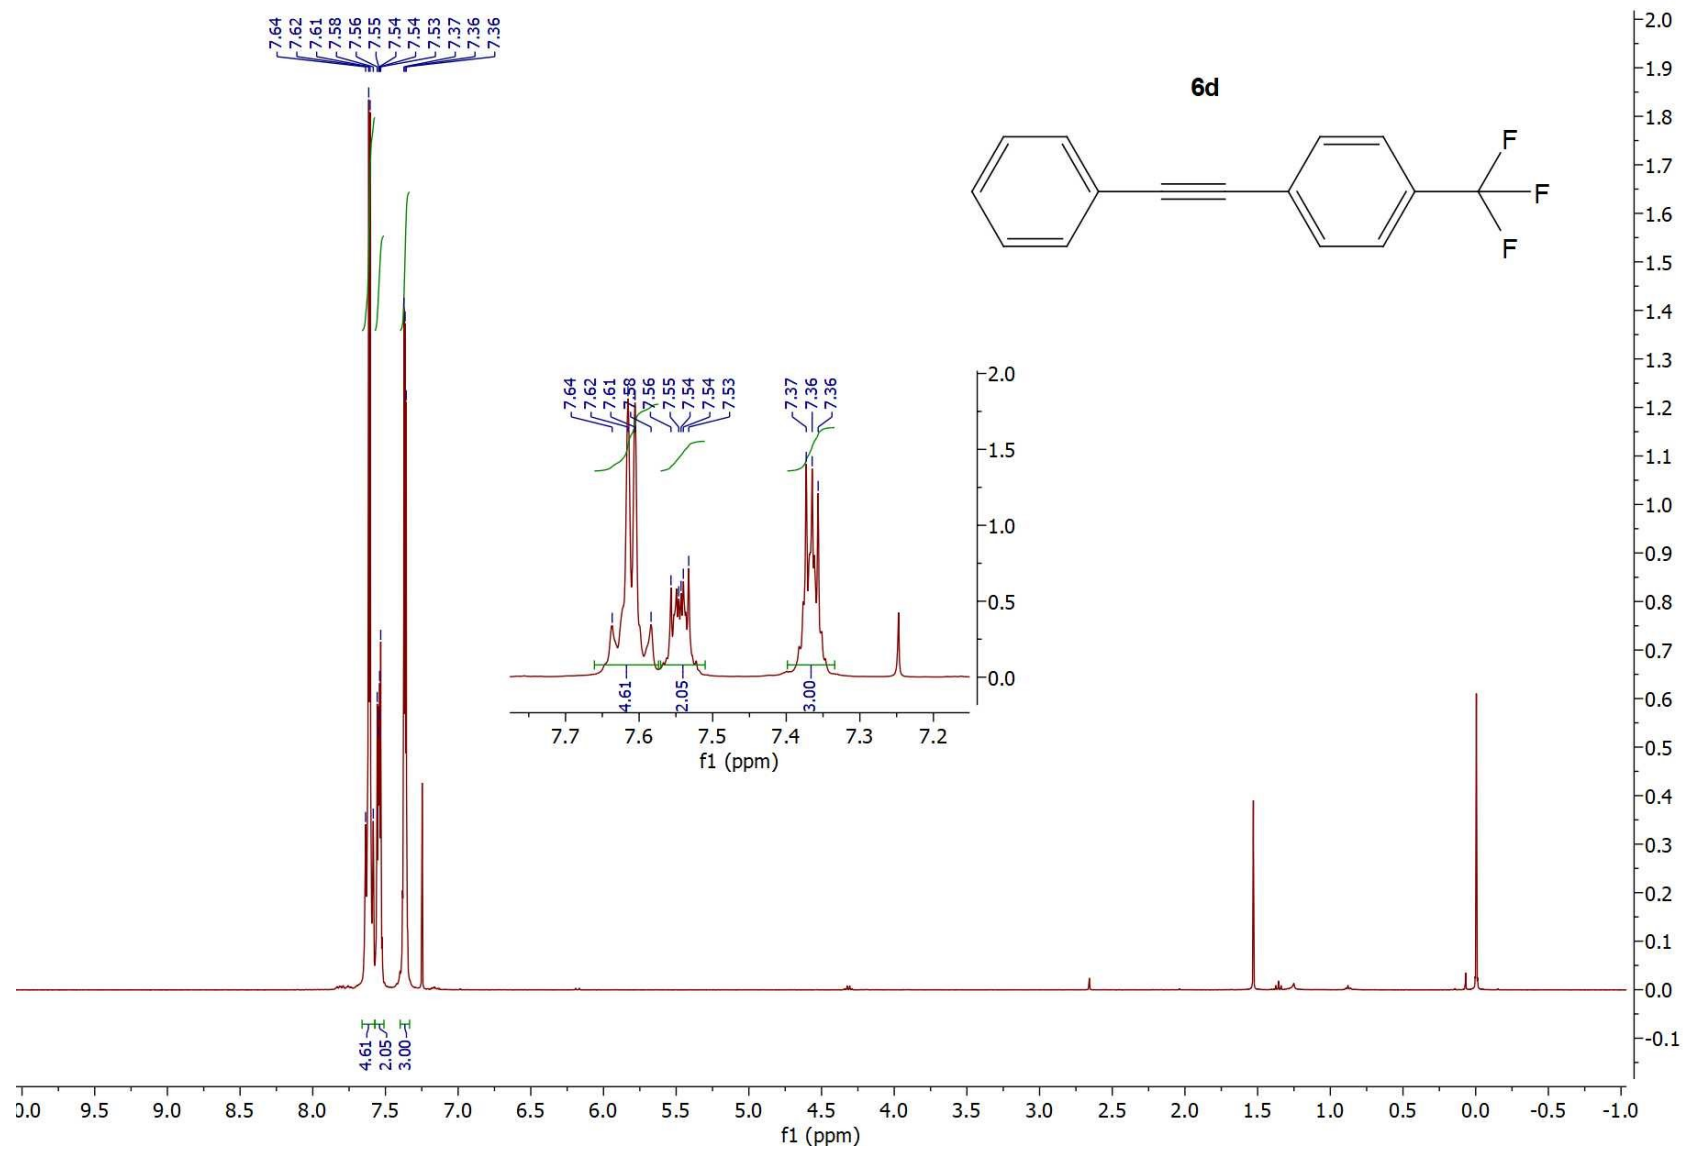

$^{13}\text{C}$  NMR (101 MHz, CHLOROFORM-*D*)  $\delta$  132.91, 131.90, 128.93, 128.55, 127.21, 125.40, 122.65, 91.84, 88.05.

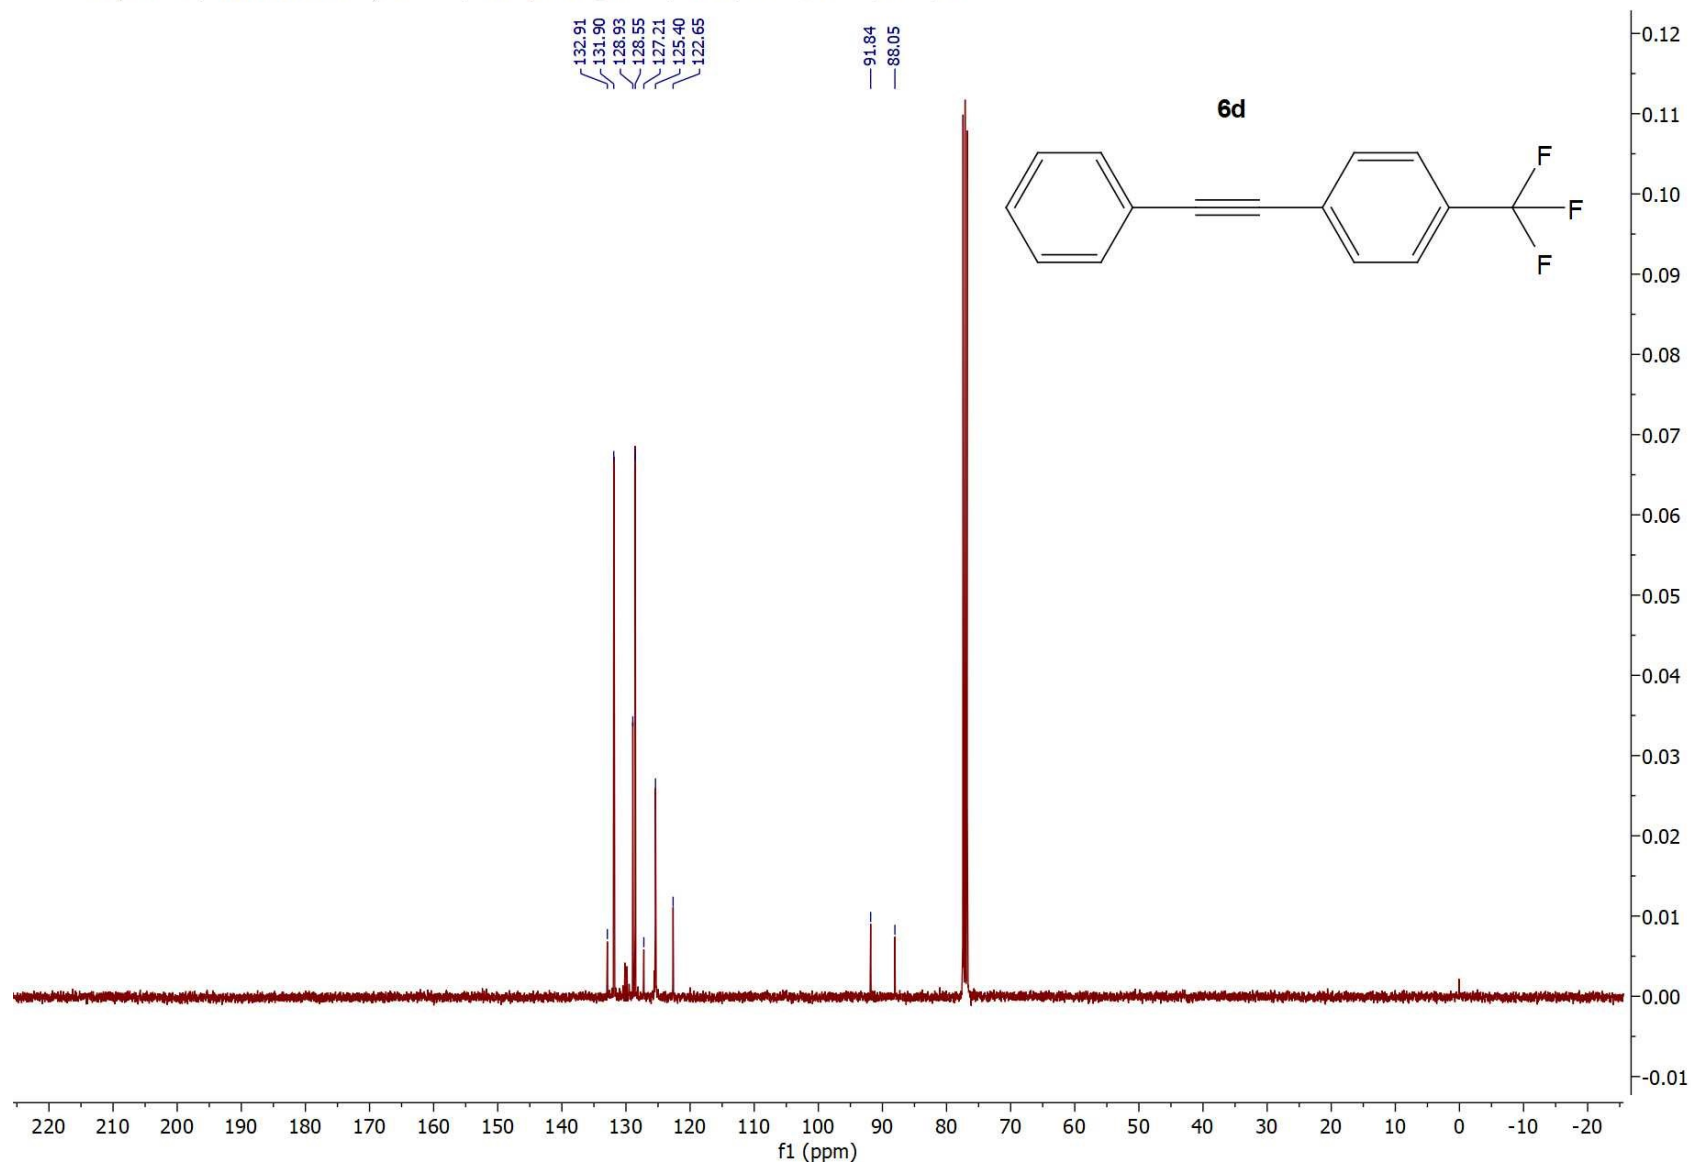



$^1\text{H}$  NMR (400 MHz, Chloroform-*d*)  $\delta$  8.62 – 8.56 (m, 2H), 7.58 – 7.50 (m, 2H), 7.41 – 7.31 (m, 5H).

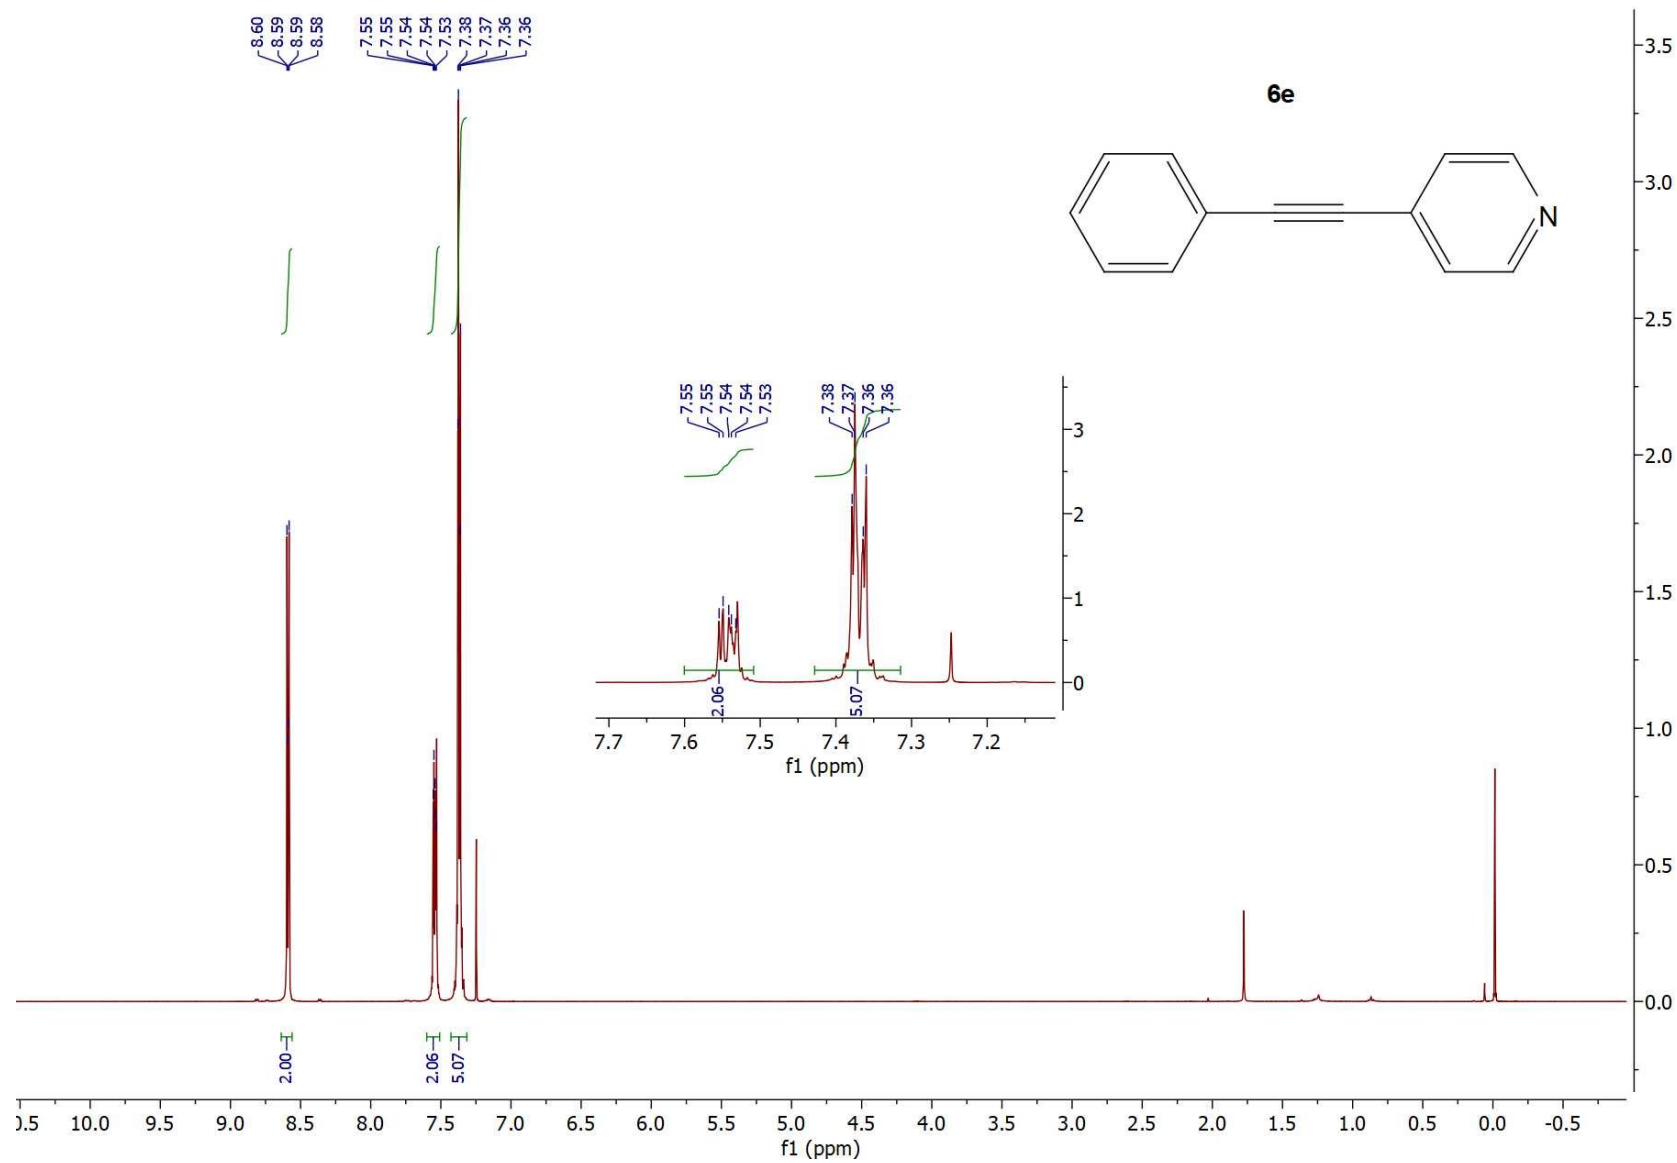

<sup>13</sup>C NMR (101 MHz, CHLOROFORM-D) δ 149.89, 131.98, 129.31, 128.60, 125.63, 122.19, 94.04, 86.75.

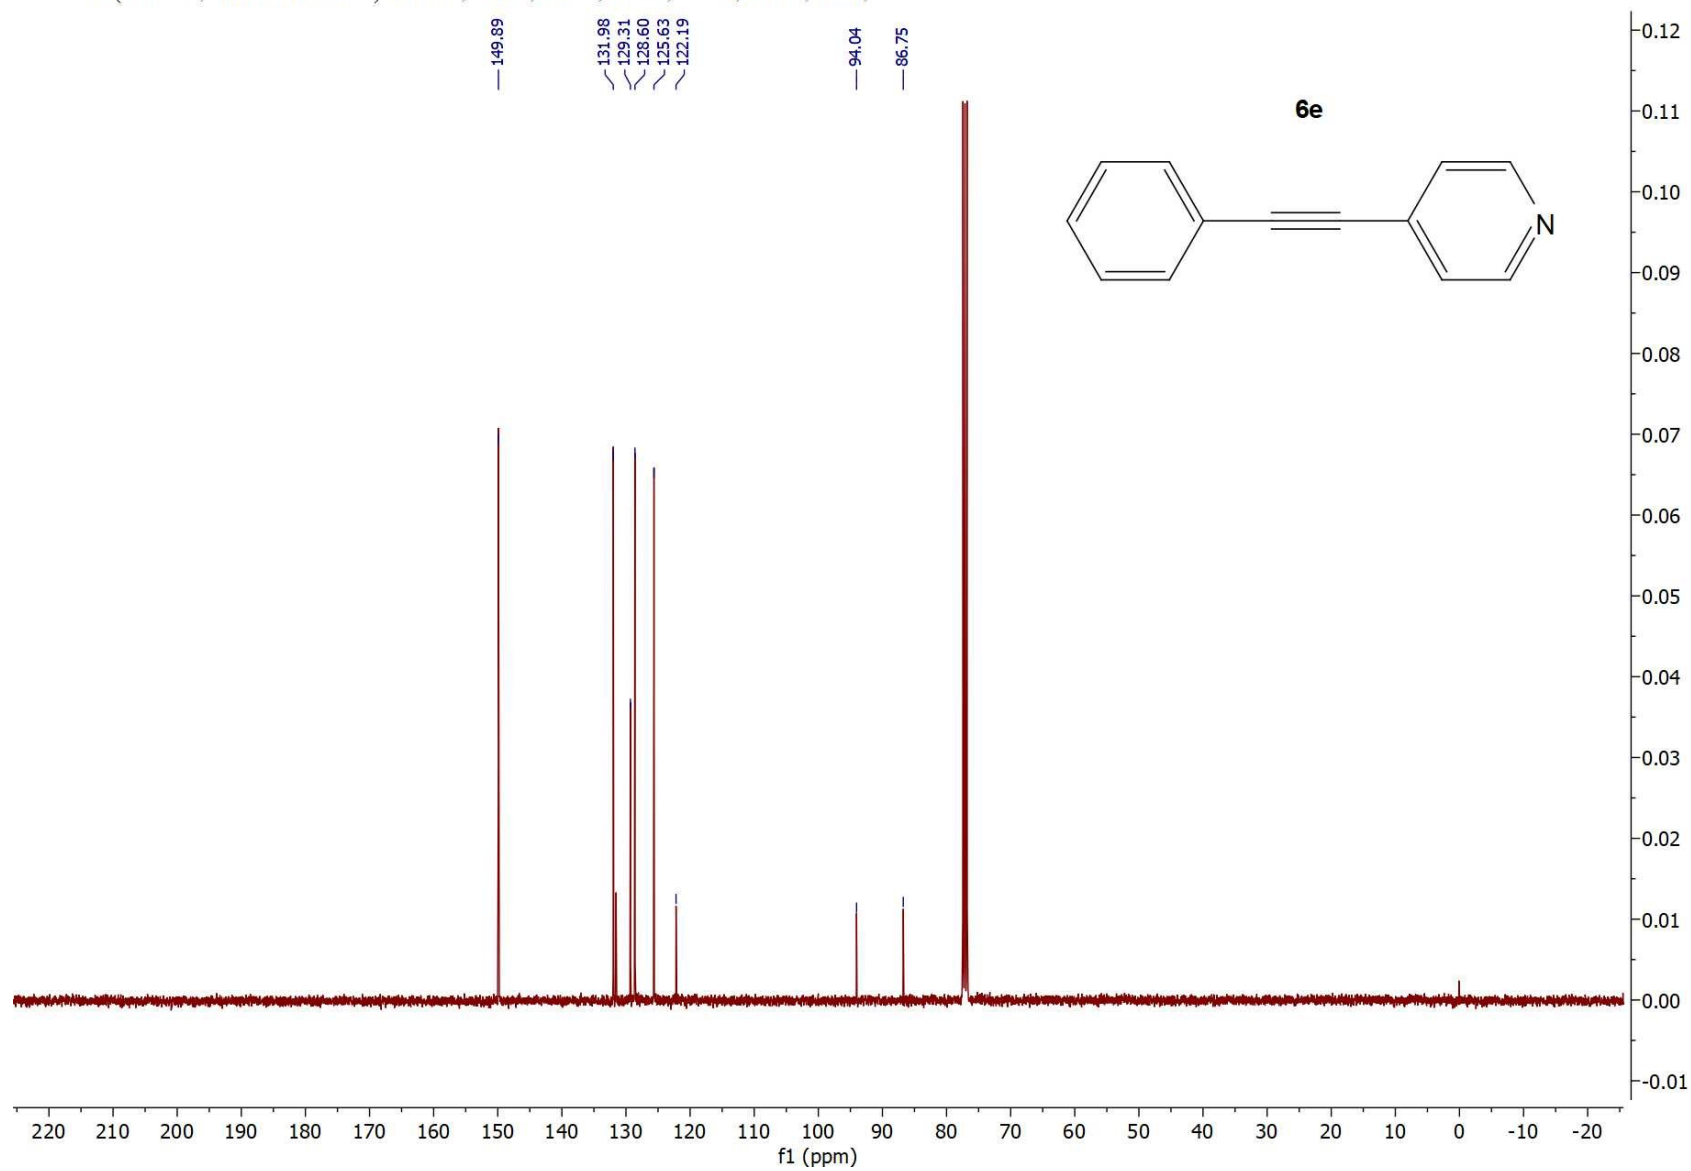

$^1\text{H}$  NMR (400 MHz, Chloroform- $d$ )  $\delta$  7.56 – 7.50 (m, 2H), 7.47 – 7.38 (m, 2H), 7.37 – 7.27 (m, 3H), 7.20 – 7.10 (m, 2H), 2.37 (s, 3H).

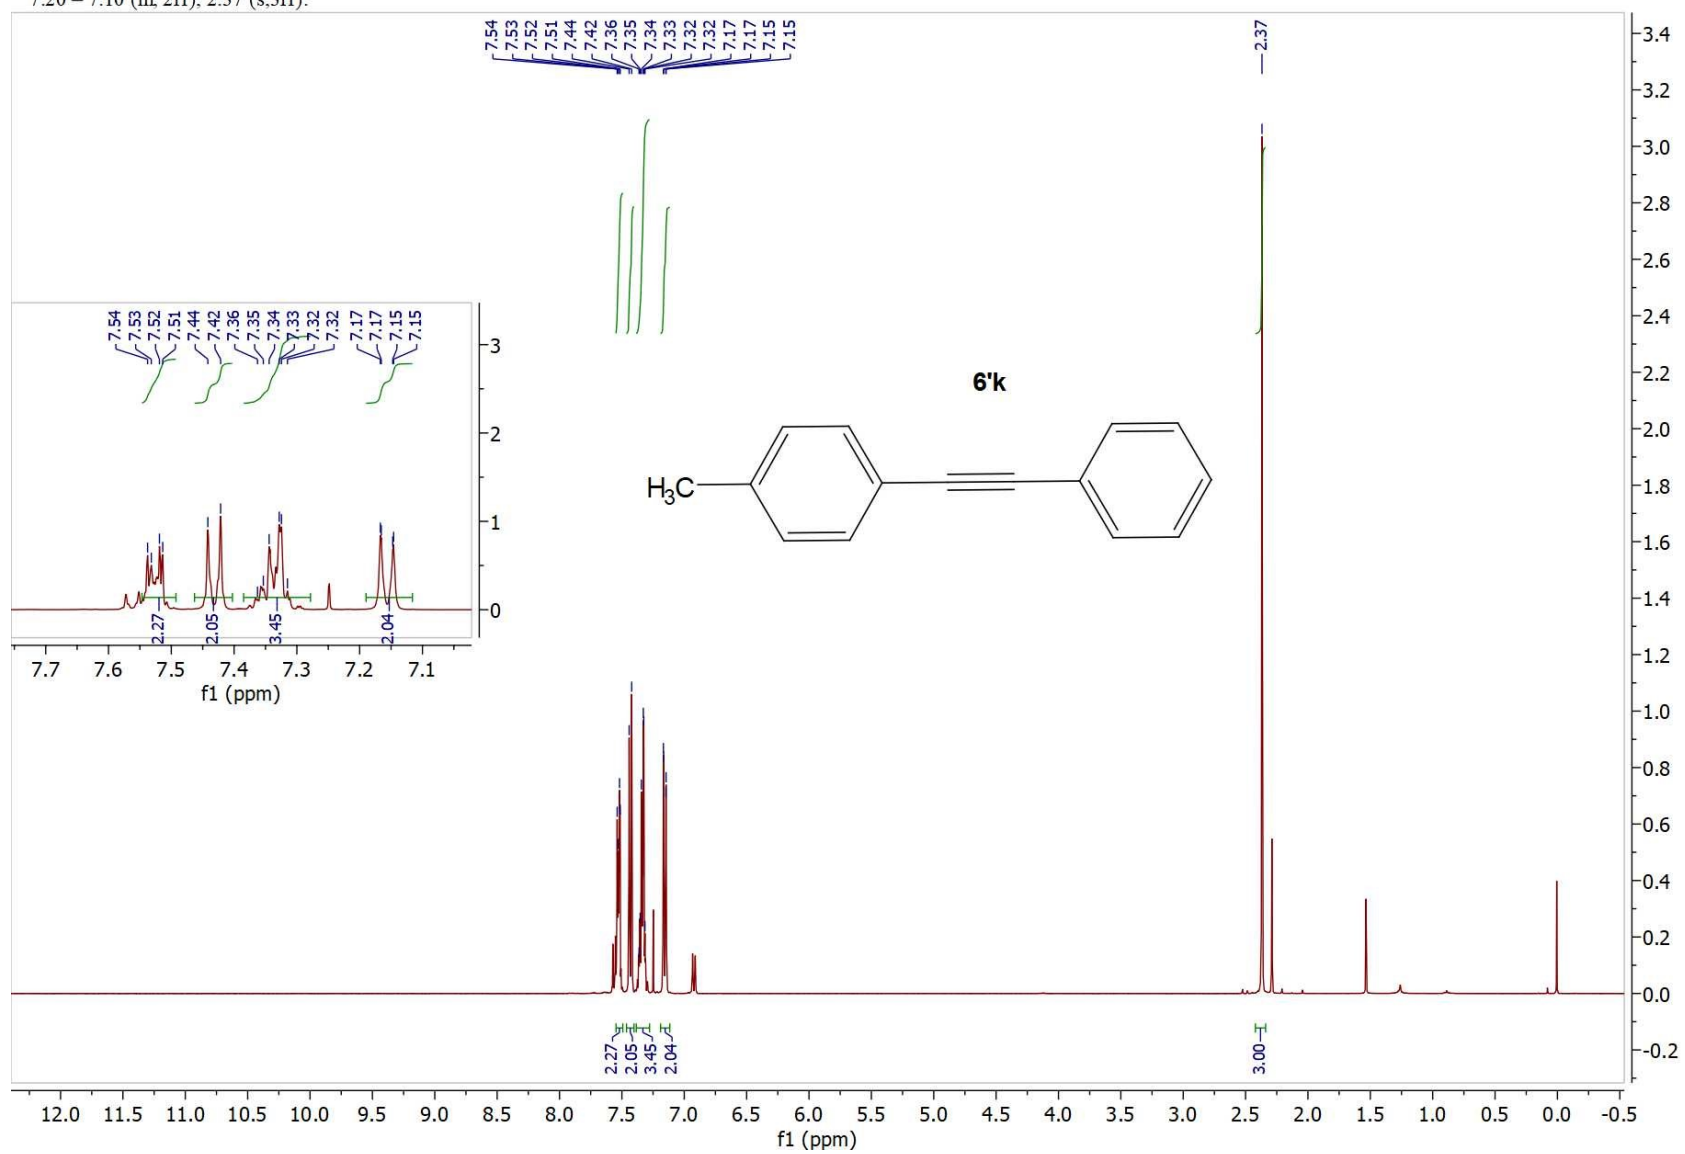

<sup>13</sup>C NMR (101 MHz, Chloroform-*d*) δ 138.50, 131.60, 128.43, 128.19, 123.58, 120.28, 89.66, 88.82, 21.58.

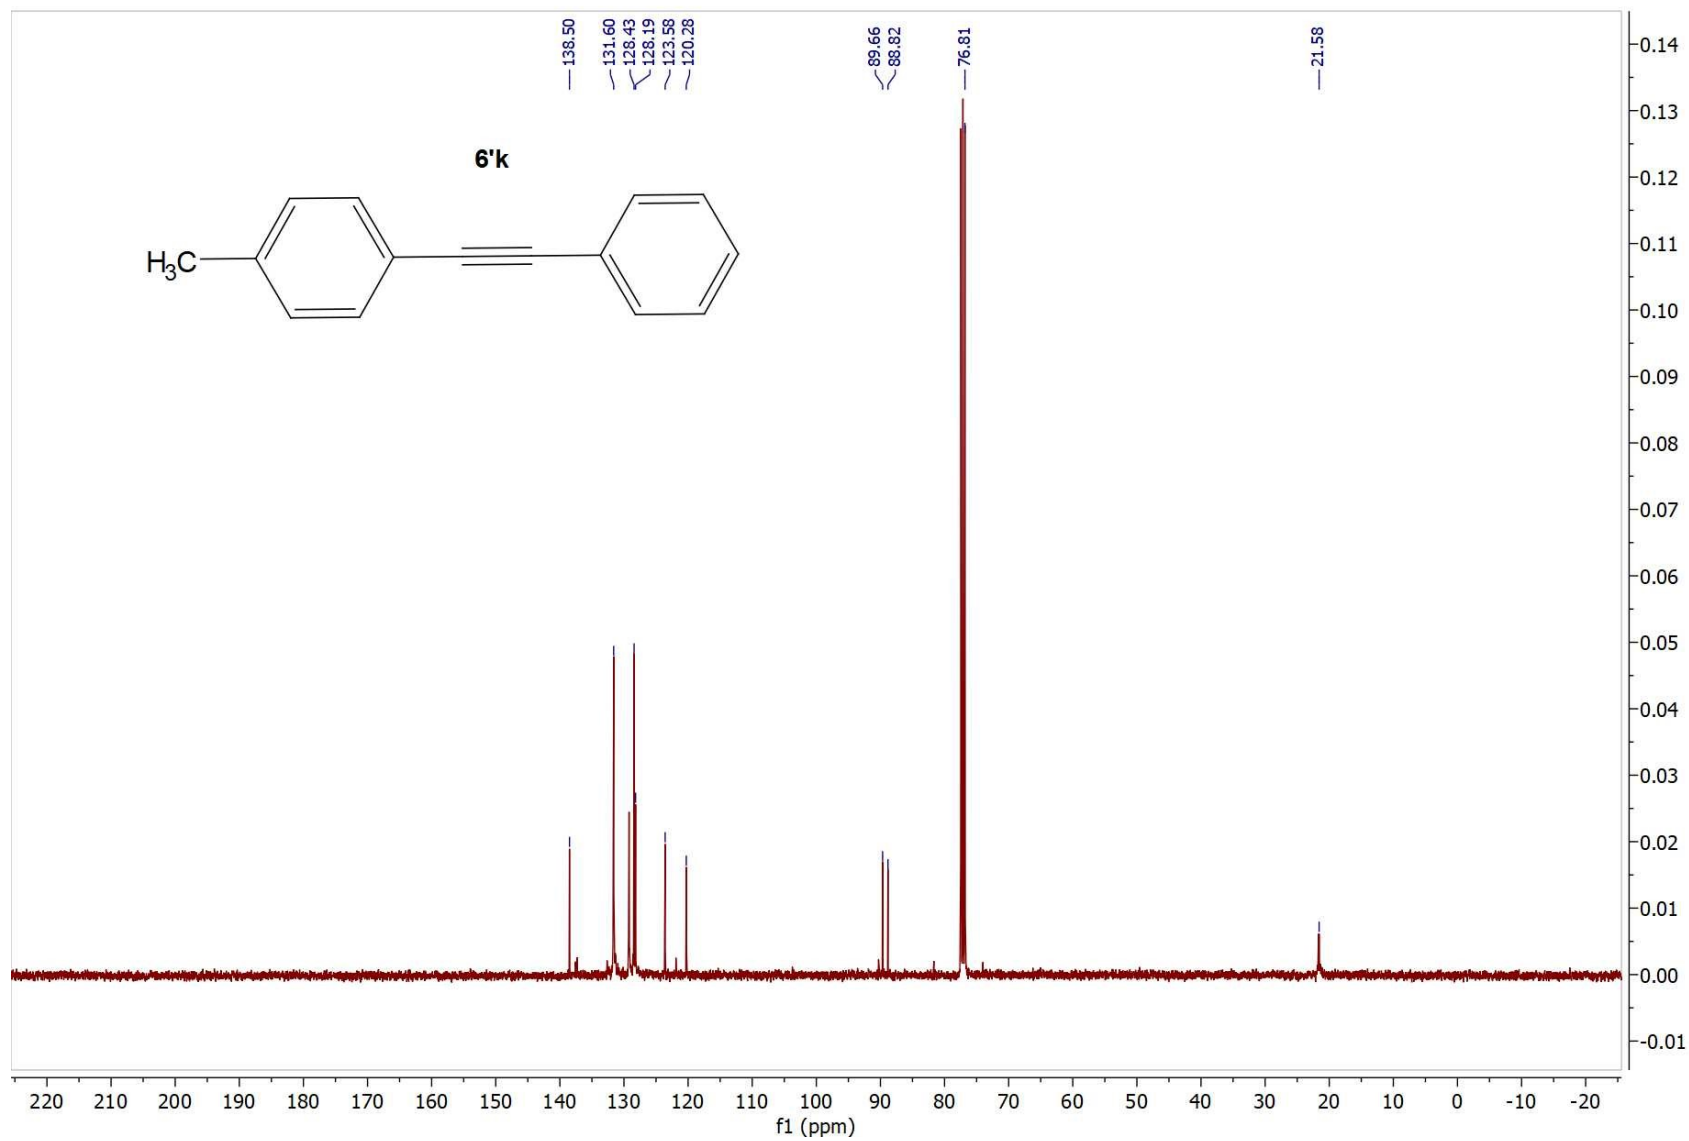

$^1\text{H}$  NMR (400 MHz, Chloroform-*d*)  $\delta$  7.89 – 7.84 (m, 2H), 7.58 (dd,  $J=7.5, 1.5$  Hz, 1H), 7.54 – 7.50 (m, 1H), 7.47 – 7.41 (m, 2H), 7.38 – 7.32 (m, 1H), 7.31 – 7.26 (m, 1H), 7.22 (m, 1H), 7.02 (s, 1H).

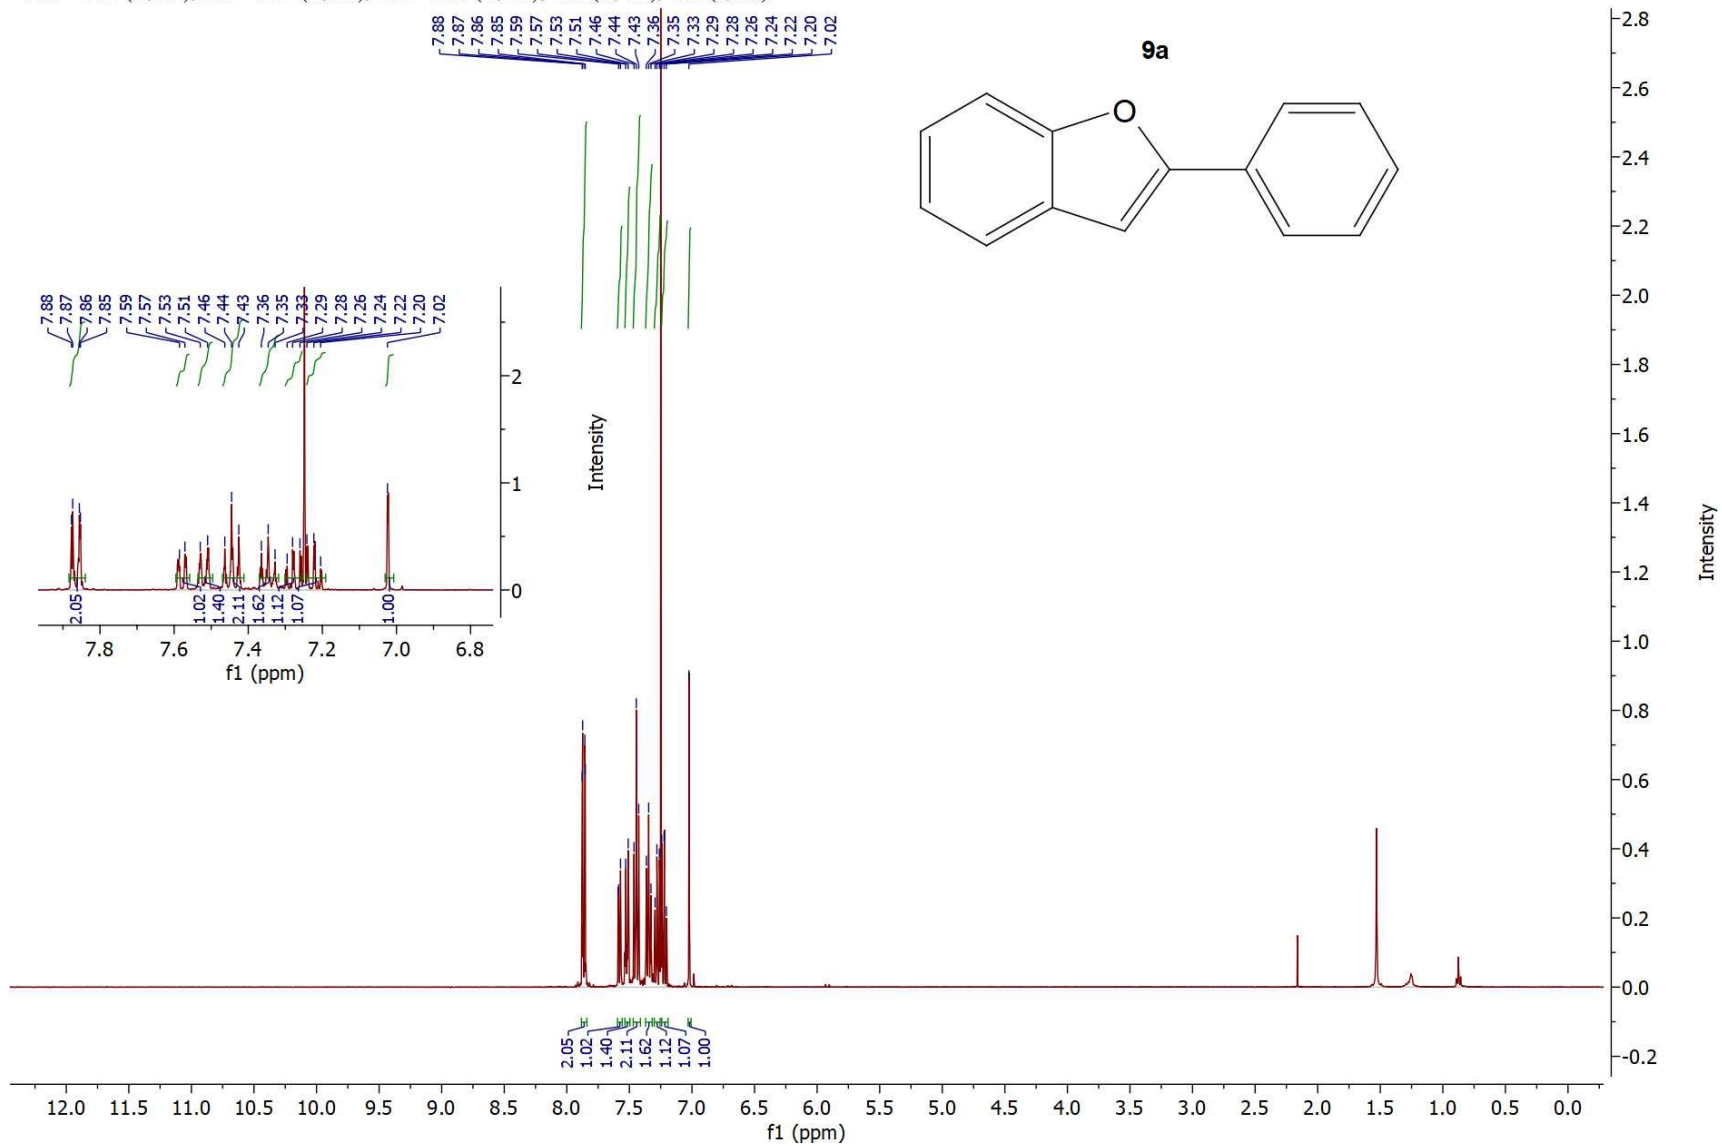

$^{13}\text{C}$  NMR (101 MHz, Chloroform-*d*)  $\delta$  156.01, 154.98, 132.61, 130.58, 129.31, 128.65, 125.03, 124.35, 123.02, 120.99, 111.27, 101.39.

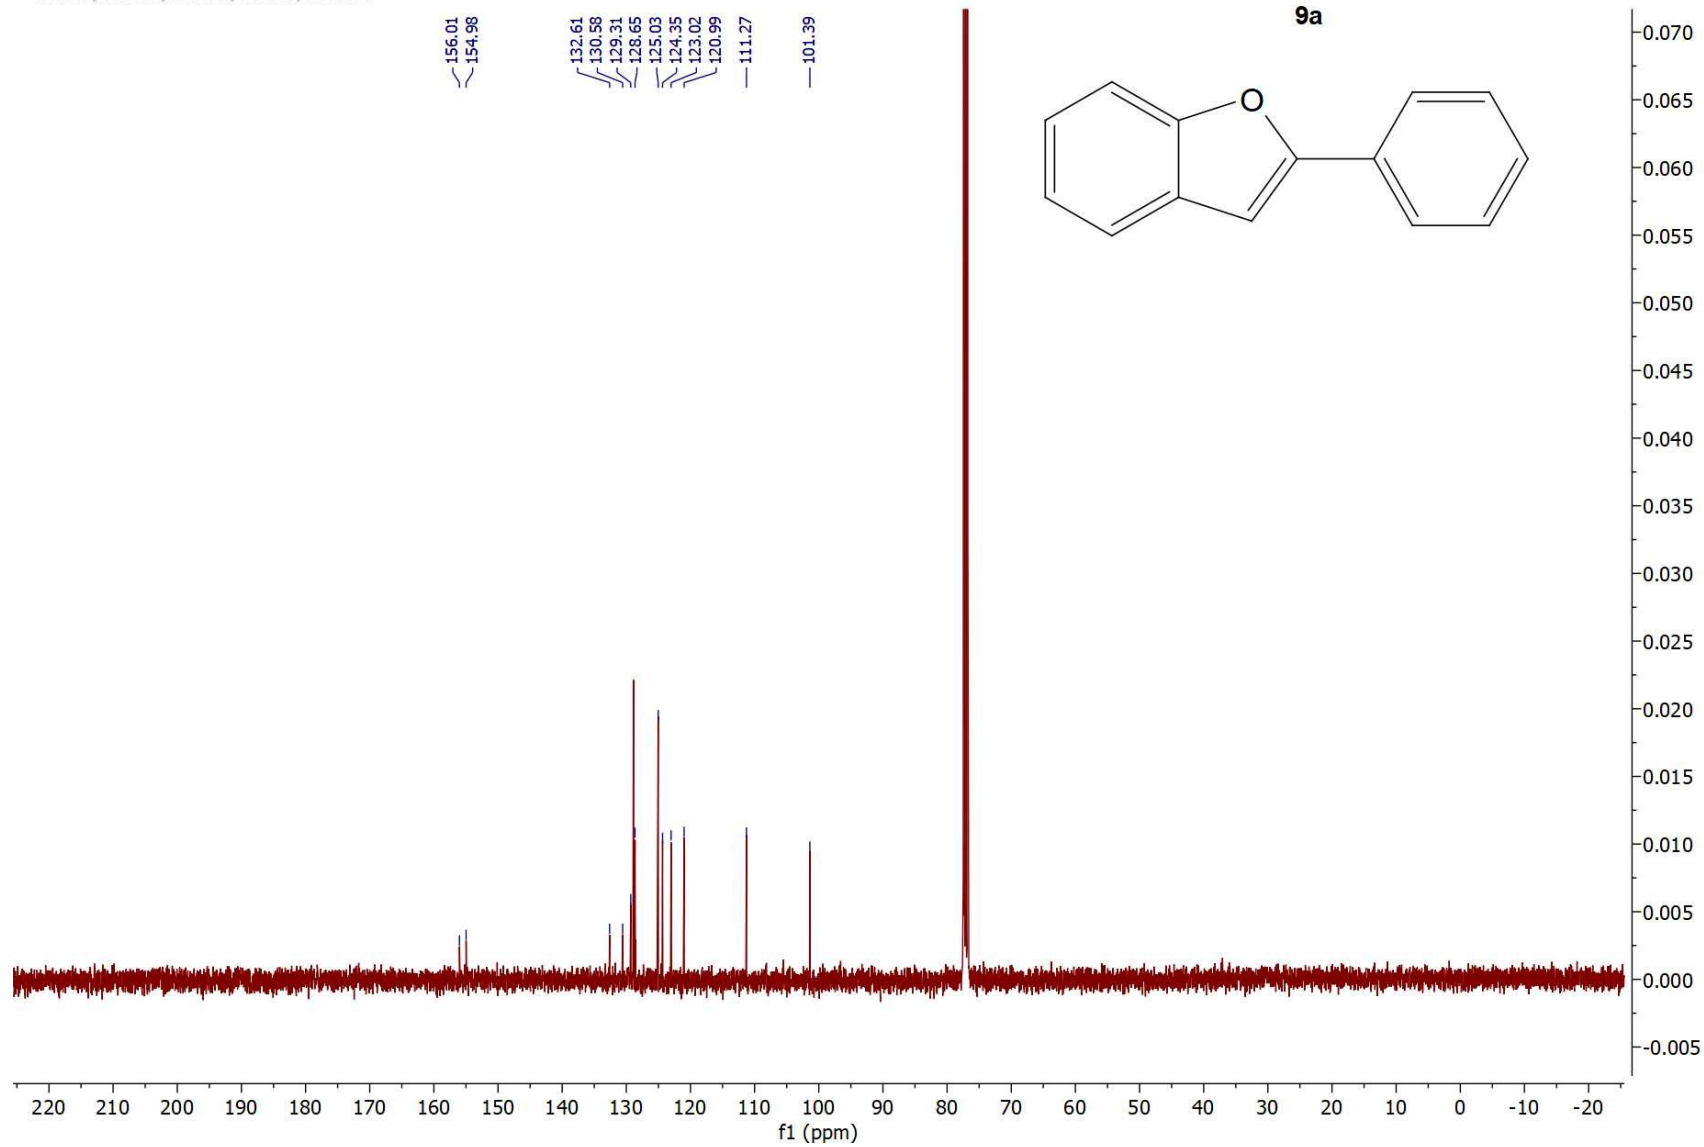

$^1\text{H}$  NMR (400 MHz, Chloroform-*d*)  $\delta$  7.81 – 7.76 (m, 2H), 7.56 – 7.52 (m, 1H), 7.50-7.48 (m, 1H), 7.24 – 7.17 (m, 2H), 6.99 – 6.95 (m, 2H), 6.88 (s, 1H), 3.86 (s, 3H).

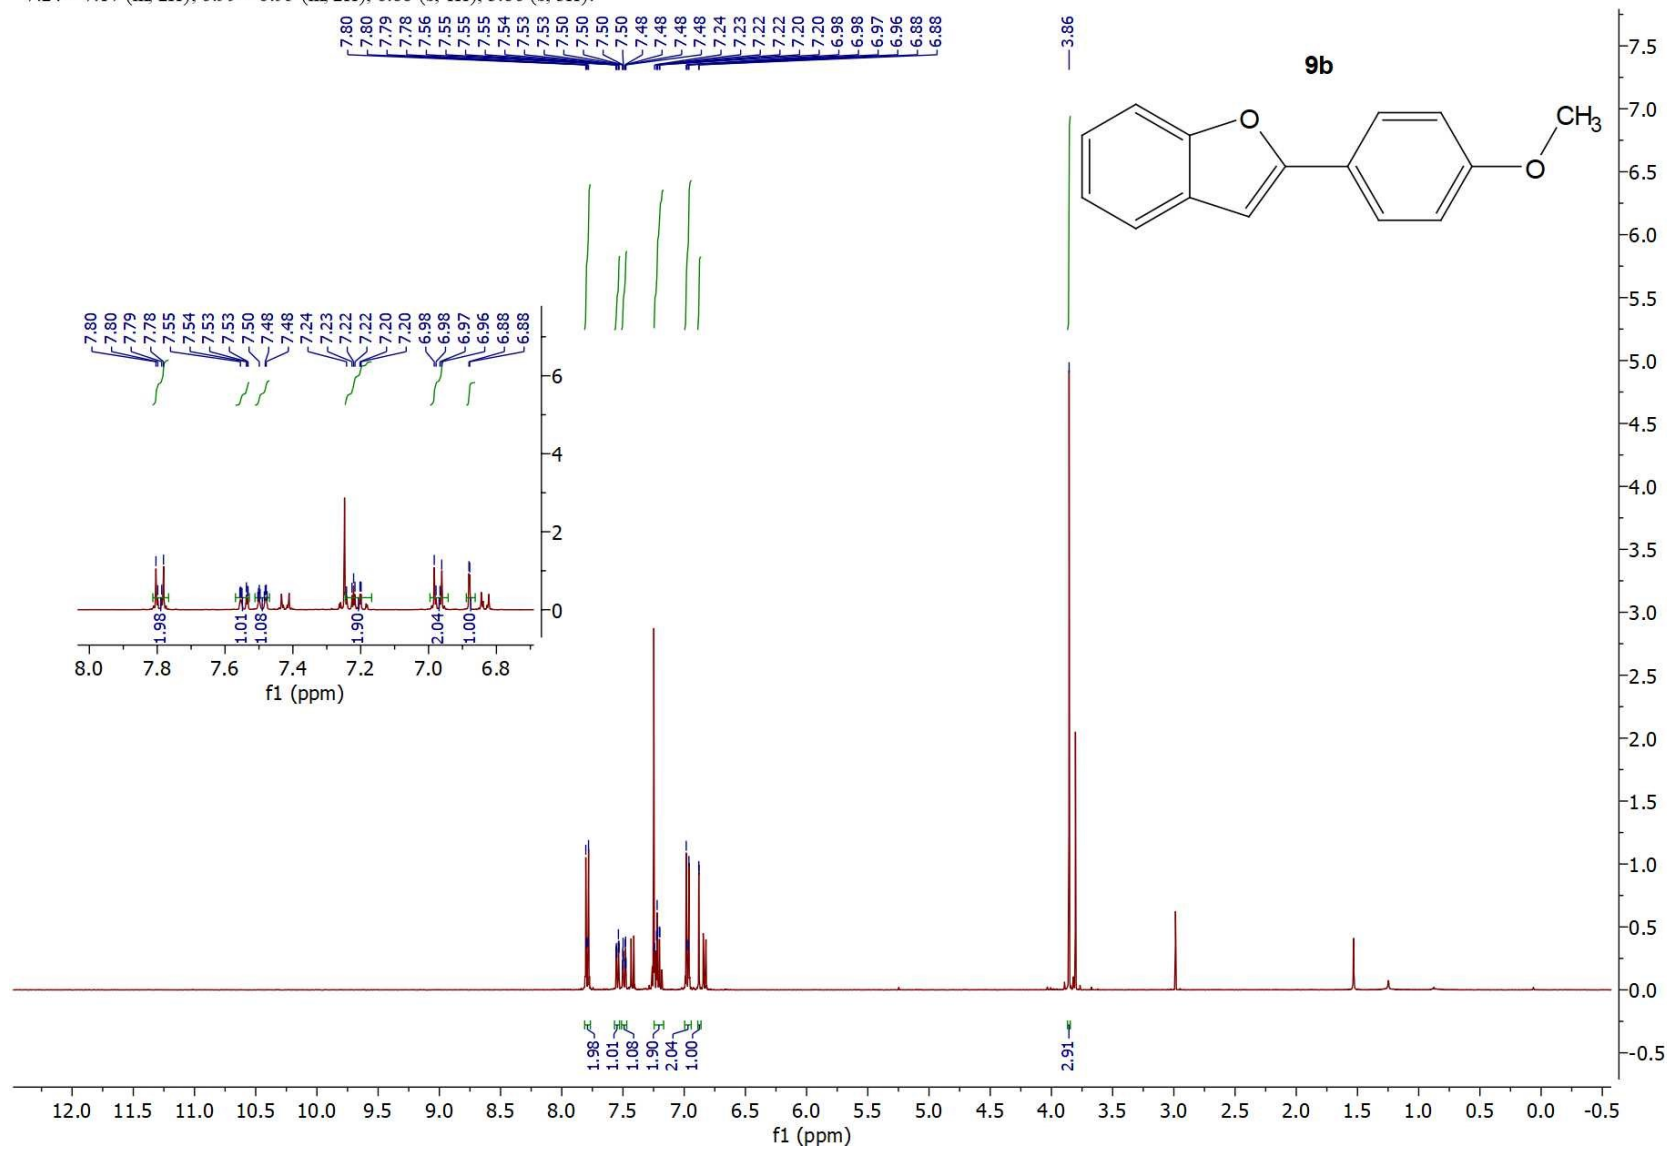

$^{13}\text{C}$  NMR (101 MHz, Chloroform-*d*)  $\delta$  160.08, 156.15, 154.79, 129.58, 126.34, 123.44, 122.91, 114.29, 111.10, 55.47.

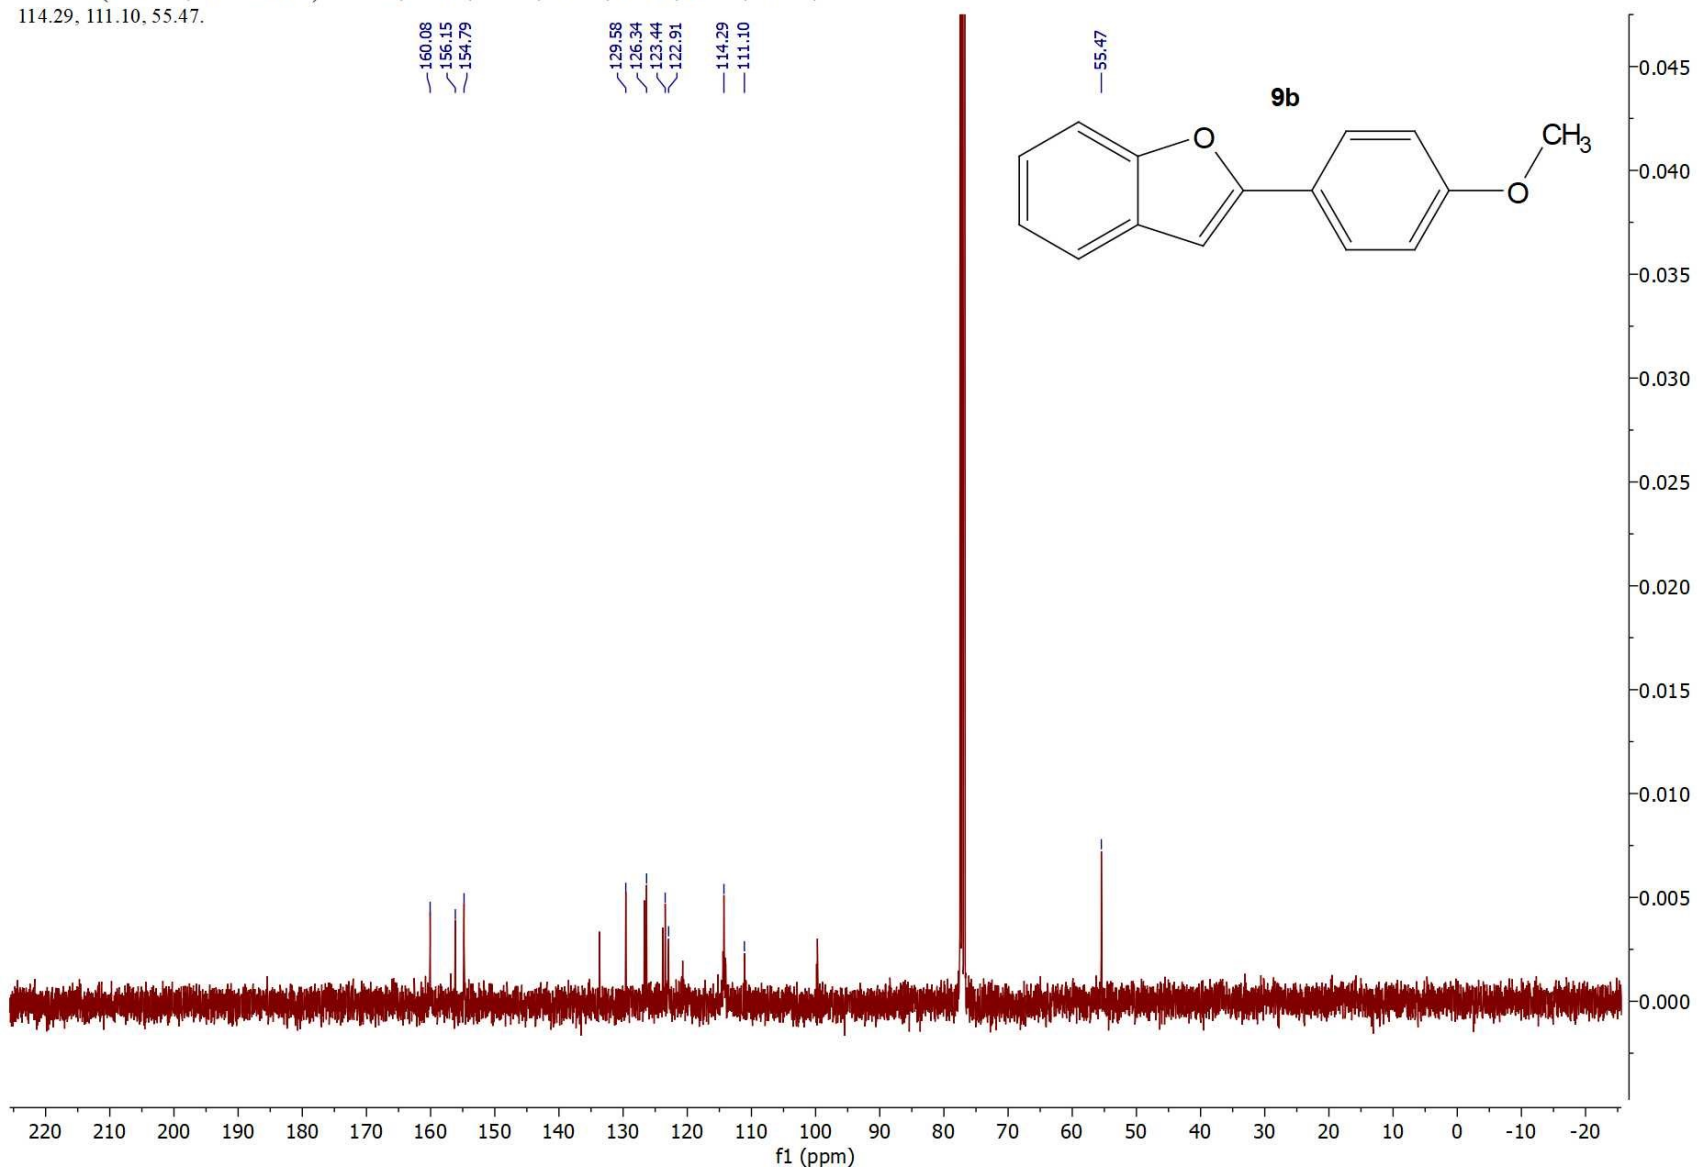



$^1\text{H}$  NMR (400 MHz, Chloroform-*d*)  $\delta$  7.83 (dd,  $J = 8.8, 5.3$  Hz, 2H), 7.57 (d,  $J = 7.4$  Hz, 1H), 7.51 – 7.48 (m, 1H), 7.30 – 7.28 (m, 1H), 7.26 – 7.20 (m, 1H), 7.16-7.11 (m, 2H), 6.95 (s, 1H)

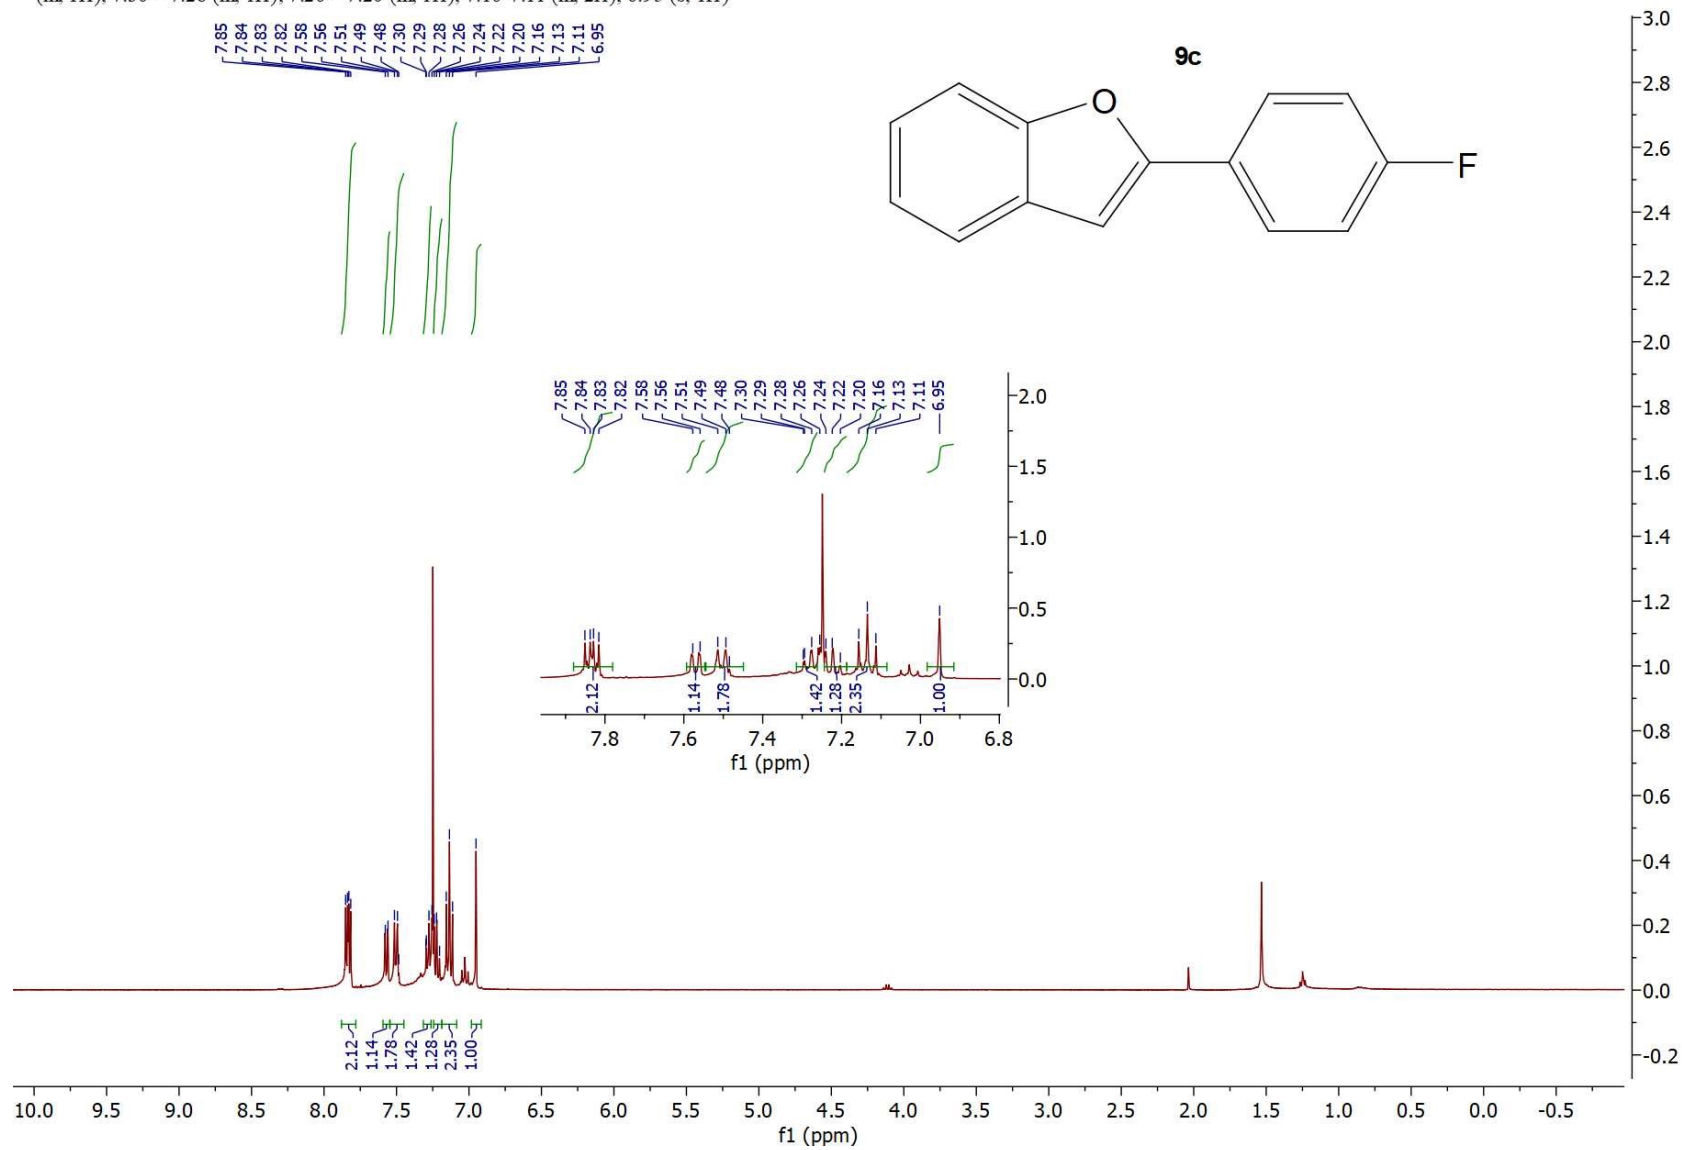

$^{13}\text{C}$  NMR (101 MHz, Chloroform- $d$ )  $\delta$  164.21, 154.94, 126.90, 126.82, 124.39, 123.12, 120.98, 116.10, 115.88, 111.23, 101.08, 77.42.

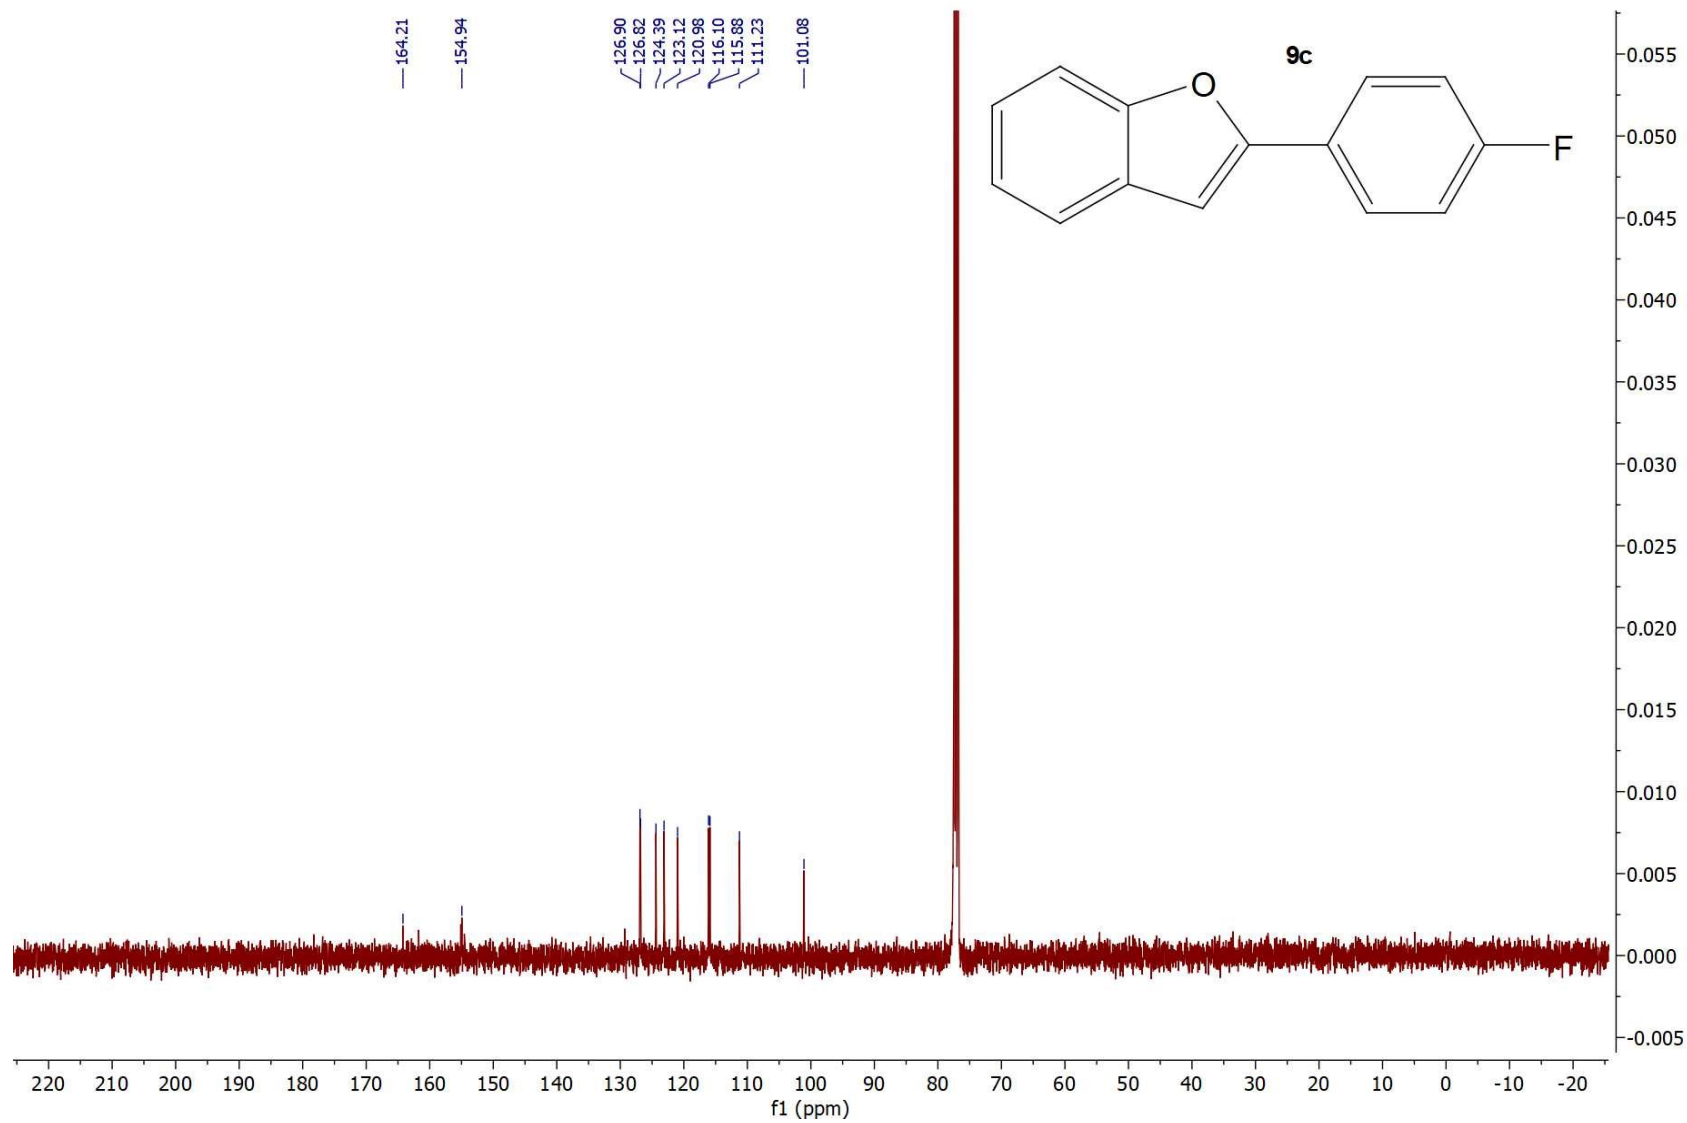

## S8. References

- 1 F. Byrne, B. Forier, G. Bossaert, C. Hoebbers, T. J. Farmer, J. H. Clark and A. J. Hunt, *Green Chem.*, 2017, **19**, 3671–3678.
- 2 P. Noppawan, S. Sangon, N. Supanchaiyamat, J. Sherwood and A. J. Hunt, *ACS Sustain. Chem. Eng.*, 2022, **10**, 4486–4493.
- 3 J. F. Campos, M.-C. Scherrmann and S. Berteina-Raboin, *Green Chem.*, 2019, **21**, 1531–1539.
- 4 C. R. McElroy, A. Constantinou, L. C. Jones, L. Summerton and J. H. Clark, *Green Chem.*, 2015, **17**, 3111–3121.
- 5 B. R. Trowse, F. P. Byrne, J. Sherwood, P. O'Brien, J. Murray and T. J. Farmer, *ACS Sustain. Chem. Eng.*, 2021, **9**, 17330–17337.
